# Supplementary material for: Strategic modular assembly of trifluoromethylated energetic materials via triazine-based scaffolds
Source: Royal Society of Chemistry journal article supplement (doi:10.1039/d6ra01290f), 2026-05-13
Supplement: d6ra01290f1.pdf [file d6ra01290f1.pdf]

## Electronic Supplementary Information

### **Strategic Modular Assembly of Trifluoromethylated Energetics via Triazine-Based Scaffolds**

Jiyuan Yu <sup>a</sup>, Xiangyan Miao <sup>a</sup>, and Yuchuan Li <sup>a,\*</sup>

a. School of Materials Science & Engineering, Beijing Institute of  
Technology, Beijing 100081, China.

E-mail: [liyuchuan@bit.edu.cn](mailto:liyuchuan@bit.edu.cn)

## Table of Contents

|                                                                                         |    |
|-----------------------------------------------------------------------------------------|----|
| 1. X-ray crystallograph.....                                                            | 3  |
| 2. Experimental .....                                                                   | 23 |
| 3. Theoretical calculations.....                                                        | 25 |
| 4. DSC spectra of all products.....                                                     | 30 |
| 5. $^1\text{H}$ , $^{19}\text{F}$ and $^{13}\text{C}$ NMR spectra of all products ..... | 32 |
| 6. HRMS of <b>3</b> and <b>6</b> .....                                                  | 37 |
| 7. Ozawa curves of <b>3-6</b> .....                                                     | 38 |
| <b>References</b> .....                                                                 | 40 |

## 1. X-ray crystallography

X-ray of all single crystals were carried out at 170 K on a Bruker D8 VENTURE diffractometer using Mo-K $\alpha$  radiation ( $\lambda = 0.71073\text{\AA}$ ). Integration and scaling of intensity data was performed using the SAINT program. Data were corrected for the effects of absorption using SADABS. The structures were solved by direct methods and refined with full-matrix least-squares technique using SHELX-2014 software. Non-hydrogen atoms were refined with anisotropic displacement parameters, and hydrogen atoms were placed in calculated positions and refined with riding model.

Table S1 Crystal data of **4**.

| Compound             | <b>4</b>                                                                                                               | <b>5</b>                                                                                                                   |
|----------------------|------------------------------------------------------------------------------------------------------------------------|----------------------------------------------------------------------------------------------------------------------------|
| CCDC                 | 2525729                                                                                                                | 2530986                                                                                                                    |
| Empirical formula    | C <sub>29</sub> H <sub>0.50</sub> Cl <sub>4</sub> F <sub>12</sub> N <sub>4</sub> O <sub>18.20</sub>                    | C <sub>7</sub> H <sub>18</sub> F <sub>3</sub> N <sub>13</sub> O <sub>8</sub>                                               |
| Formula weight       | 1682.35                                                                                                                | 469.34                                                                                                                     |
| Temperature          | 170.00 K                                                                                                               | 100 K                                                                                                                      |
| Crystal system       | Triclinic                                                                                                              | Triclinic                                                                                                                  |
| Space group          | <i>P</i> -1                                                                                                            | <i>P</i> -1                                                                                                                |
| Unit cell dimensions | a = 13.619(2) Å $\alpha$ = 69.224(6)°<br>b = 15.295(3) Å $\beta$ = 69.711(6)°<br>c = 17.404(2) Å $\gamma$ = 83.327(7)° | a = 8.1025(10) Å $\alpha$ = 93.339(5)°<br>b = 8.1837(11) Å $\beta$ = 97.166(5)°<br>c = 14.7785(16) Å $\gamma$ = 99.686(6)° |
| Volume               | 3179.2(9) Å <sup>3</sup>                                                                                               | 955.3(2) Å <sup>3</sup>                                                                                                    |
| Z                    | 2                                                                                                                      | 2                                                                                                                          |
| Density(calculated)  | 1.757 g cm <sup>-3</sup>                                                                                               | 1.632 g cm <sup>-3</sup>                                                                                                   |

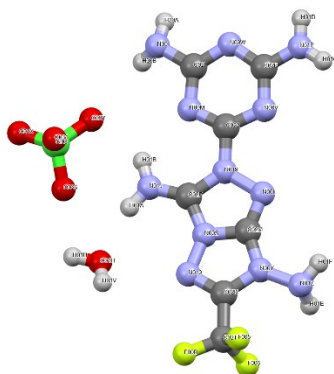

Figure S1. Single-crystal X-ray structures of **4**.

Table S2 Fractional Atomic Coordinates ( $\times 10^4$ ) and Equivalent Isotropic Displacement Parameters ( $\text{\AA}^2 \times 10^3$ ) for **4**.  $U_{eq}$  is defined as 1/3 of the trace of the orthogonalised  $U_{ij}$  tensor.

| Atom   | x        | y       | z         | $U(eq)$ |
|--------|----------|---------|-----------|---------|
| Cl(01) | 17102(2) | 1266(2) | -10437(1) | 44(1)   |
| Cl(02) | 15653(2) | 2322(2) | -5227(2)  | 49(1)   |
| Cl(03) | 10585(2) | 4694(2) | -6272(2)  | 58(1)   |
| Cl(00) | 18854(3) | 5196(3) | -8808(3)  | 97(1)   |

---

|        |          |         |           |       |
|--------|----------|---------|-----------|-------|
| F(005) | 13326(4) | 293(4)  | -2123(3)  | 57(2) |
| F(006) | 12067(4) | -571(4) | -1921(3)  | 57(2) |
| F(007) | 15524(4) | 2691(4) | -12897(3) | 66(2) |
| F(008) | 14228(5) | 2087(5) | -12964(3) | 67(2) |
| F(009) | 14145(6) | 3492(4) | -12952(4) | 75(2) |
| F(00A) | 7532(5)  | 5695(4) | -6242(4)  | 67(2) |
| F(00B) | 6179(5)  | 4892(4) | -5847(4)  | 74(2) |
| O(00C) | 12714(5) | 6223(5) | -7732(4)  | 46(2) |
| F(00D) | 11782(5) | 824(4)  | -1899(4)  | 79(2) |
| F(00E) | 20754(5) | 1520(5) | -10023(4) | 78(2) |
| F(00F) | 21054(4) | 2524(5) | -11278(4) | 79(2) |
| N(00G) | 10188(5) | 823(5)  | -4389(4)  | 34(2) |
| N(00H) | 13056(5) | 1413(5) | -9056(4)  | 33(2) |
| N(00I) | 9180(5)  | 833(5)  | -2966(4)  | 35(2) |
| N(00J) | 13249(5) | 2201(5) | -10376(4) | 36(2) |
| N(00K) | 11430(5) | -322(5) | -4505(4)  | 39(2) |
| N(00L) | 13772(5) | 879(5)  | -5414(4)  | 39(2) |
| N(00M) | 13211(5) | 2885(5) | -7079(4)  | 37(2) |
| F(00N) | 6400(6)  | 5512(5) | -5000(4)  | 82(2) |
| N(00O) | 16920(5) | 3966(5) | -9245(4)  | 37(2) |
| N(00P) | 13227(5) | 320(5)  | -7795(4)  | 38(2) |
| N(00Q) | 18963(5) | 3258(5) | -10742(4) | 37(2) |
| N(00R) | 18212(5) | 3037(5) | -9374(4)  | 36(2) |
| N(00S) | 12603(5) | 1476(5) | -4480(4)  | 38(2) |
| N(00T) | 13793(5) | 913(5)  | -9539(4)  | 38(2) |
| N(00U) | 7340(5)  | 3938(5) | -4361(4)  | 37(2) |
| N(00V) | 14471(5) | 1671(5) | -7140(4)  | 38(2) |
| N(00W) | 14382(5) | 2855(5) | -8449(4)  | 36(2) |
| N(00X) | 8024(5)  | 3688(5) | -5646(4)  | 36(2) |
| N(00Y) | 13311(5) | 250(5)  | -3799(4)  | 38(2) |
| N(00Z) | 8877(5)  | 1910(5) | -4150(4)  | 36(2) |
| N(010) | 12179(5) | 1419(5) | -3619(4)  | 42(2) |
| N(011) | 14364(5) | 1467(5) | -11163(4) | 39(2) |
| N(012) | 8950(5)  | 2236(5) | -5049(4)  | 40(2) |
| N(013) | 10494(5) | -322(5) | -3134(4)  | 36(2) |
| N(014) | 7961(5)  | 3139(5) | -4315(4)  | 36(2) |
| N(015) | 12016(5) | 1580(5) | -7758(4)  | 34(2) |
| N(016) | 13380(6) | 2762(5) | -11226(4) | 42(2) |
| N(017) | 15923(5) | 5311(5) | -9500(4)  | 38(2) |
| N(018) | 15726(5) | 4248(5) | -8062(4)  | 37(2) |
| N(019) | 13310(5) | 1712(5) | -5837(4)  | 36(2) |
| N(01A) | 19017(5) | 2393(5) | -9413(5)  | 41(2) |
| N(01B) | 12142(5) | 443(5)  | -6433(4)  | 37(2) |
| F(01C) | 19993(5) | 1415(6) | -10885(6) | 95(3) |

---

---

|        |          |          |           |       |
|--------|----------|----------|-----------|-------|
| N(01D) | 14728(6) | 5653(5)  | -8266(4)  | 42(2) |
| N(01E) | 7966(6)  | 2333(6)  | -2865(5)  | 47(2) |
| O(01F) | 16030(6) | 2731(6)  | -4780(5)  | 70(2) |
| N(01G) | 17184(6) | 2908(5)  | -7906(4)  | 43(2) |
| O(01H) | 10608(6) | 2906(5)  | -3828(5)  | 62(2) |
| N(01I) | 10956(6) | 1669(5)  | -6421(5)  | 42(2) |
| N(01J) | 12047(6) | 2833(5)  | -5404(5)  | 47(2) |
| N(01K) | 14905(6) | 6626(5)  | -9647(5)  | 46(2) |
| N(01L) | 15056(6) | 838(6)   | -11511(5) | 47(2) |
| N(01M) | 17410(5) | 4177(5)  | -10154(4) | 40(2) |
| O(01N) | 11394(7) | -2057(5) | -2873(6)  | 71(2) |
| N(01O) | 13386(6) | -711(5)  | -6532(5)  | 48(2) |
| N(01P) | 15617(6) | 1716(6)  | -8445(5)  | 49(2) |
| N(01Q) | 14584(6) | 4609(5)  | -6885(5)  | 45(2) |
| N(01R) | 9516(6)  | -254(5)  | -1776(4)  | 44(2) |
| N(01T) | 12071(6) | 2855(5)  | -9360(5)  | 49(2) |
| N(01U) | 19162(6) | 3484(6)  | -11634(5) | 49(2) |
| O(01V) | 17996(6) | 1122(6)  | -11094(4) | 73(2) |
| O(01W) | 17278(6) | 2017(6)  | -10180(5) | 78(2) |
| O(01X) | 16258(6) | 1537(6)  | -10767(6) | 73(2) |
| C(01Y) | 9467(6)  | 1135(5)  | -3824(5)  | 32(2) |
| N(01Z) | 13917(6) | -536(6)  | -3518(5)  | 52(2) |
| O(020) | 16820(7) | 438(6)   | -9693(5)  | 76(2) |
| C(021) | 11722(6) | 1208(6)  | -6873(5)  | 34(2) |
| C(022) | 13692(6) | 2123(6)  | -6748(5)  | 33(2) |
| C(023) | 8251(6)  | 2440(6)  | -3698(5)  | 34(2) |
| C(024) | 13855(6) | 1412(6)  | -10317(5) | 34(2) |
| C(025) | 12742(6) | 1088(6)  | -8138(5)  | 33(2) |
| O(026) | 10152(6) | 4053(5)  | -5409(5)  | 72(2) |
| C(027) | 9741(6)  | 86(6)    | -2638(5)  | 36(2) |
| C(028) | 10669(6) | 50(6)    | -3993(5)  | 36(2) |
| N(029) | 8197(7)  | 3799(6)  | -6523(5)  | 57(2) |
| C(02A) | 16151(6) | 4543(6)  | -8926(6)  | 37(2) |
| C(02B) | 12891(6) | 43(6)    | -6917(5)  | 34(2) |
| C(02C) | 18156(7) | 3577(6)  | -10169(5) | 35(2) |
| C(02D) | 8383(6)  | 2961(6)  | -5078(5)  | 36(2) |
| C(02E) | 14806(6) | 2086(6)  | -7997(5)  | 36(2) |
| C(02F) | 12600(7) | 2097(6)  | -5267(5)  | 39(2) |
| C(02G) | 15188(7) | 5845(6)  | -9123(5)  | 38(2) |
| C(02H) | 12642(6) | 658(6)   | -3240(5)  | 37(2) |
| C(02I) | 13596(7) | 3224(6)  | -7957(6)  | 38(2) |
| C(02J) | 15012(6) | 4846(6)  | -7751(6)  | 38(2) |
| C(02K) | 17404(7) | 3277(6)  | -8757(6)  | 39(2) |
| C(02L) | 19409(6) | 2545(6)  | -10234(5) | 36(2) |

---

|        |            |           |            |        |
|--------|------------|-----------|------------|--------|
| C(02M) | 13315(6)   | 792(6)    | -4607(5)   | 34(2)  |
| C(02N) | 14041(7)   | 2310(6)   | -11652(5)  | 39(2)  |
| C(02O) | 12724(6)   | 2205(6)   | -9560(5)   | 35(2)  |
| O(02P) | 10453(7)   | 3342(7)   | -7924(6)   | 92(3)  |
| C(02Q) | 7420(7)    | 4232(6)   | -5180(5)   | 40(2)  |
| C(02R) | 6881(7)    | 5093(7)   | -5562(6)   | 46(2)  |
| C(02S) | 14489(8)   | 2646(7)   | -12633(6)  | 50(3)  |
| C(02T) | 12427(8)   | 283(7)    | -2273(6)   | 50(2)  |
| C(02U) | 20303(7)   | 1997(7)   | -10614(6)  | 49(3)  |
| O(02V) | 19365(9)   | 5230(8)   | -8242(7)   | 73(4)  |
| O(02W) | 16006(10)  | 2921(8)   | -6119(7)   | 70(3)  |
| O(02X) | 9868(14)   | 5325(13)  | -6508(11)  | 67(3)  |
| O(02Y) | 11075(14)  | 4238(12)  | -6882(11)  | 68(3)  |
| O(02Z) | 19200(70)  | 4380(40)  | -8220(50)  | 80(4)  |
| O(030) | 19000(30)  | 5970(30)  | -9580(30)  | 76(4)  |
| O(031) | 11388(13)  | 5061(13)  | -6155(11)  | 77(3)  |
| O(1)   | 15979(10)  | 1417(8)   | -5150(8)   | 68(2)  |
| O(2)   | 14524(8)   | 2419(8)   | -4941(7)   | 65(2)  |
| O(3)   | 17728(14)  | 5080(20)  | -8281(17)  | 59(4)  |
| N(30)  | 13150(6)   | 4018(5)   | -8357(5)   | 45(2)  |
| O(5)   | 15251(19)  | 1385(16)  | -4637(16)  | 61(3)  |
| O(4)   | 16570(20)  | 1770(18)  | -5545(17)  | 67(3)  |
| O(10)  | 15240(20)  | 2664(17)  | -5885(15)  | 64(3)  |
| O(33)  | 17890(20)  | 5480(30)  | -8980(30)  | 76(4)  |
| C(1)   | 10133(12)  | 4125(12)  | -8566(13)  | 133(7) |
| O(7)   | 11596(13)  | 4414(11)  | -6726(11)  | 72(3)  |
| O(9)   | 9839(13)   | 4898(14)  | -6701(12)  | 77(3)  |
| O(8)   | 10777(13)  | 5619(11)  | -6307(10)  | 73(3)  |
| O(6)   | 19236(14)  | 4344(11)  | -9007(12)  | 72(3)  |
| O(11)  | 19100(130) | 6230(120) | -9350(120) | 79(5)  |

Table S3 Anisotropic Displacement Parameters ( $\text{\AA}^2 \times 10^3$ ) for **4**. The Anisotropic displacement factor exponent takes the form:  $-2\pi^2[h^2a^*2U_{11}+2hka^*b^*U_{12}+\dots]$ .

| Atom   | U11    | U22   | U33    | U23    | U13    | U12    |
|--------|--------|-------|--------|--------|--------|--------|
| Cl(01) | 45(1)  | 55(1) | 32(1)  | -20(1) | -6(1)  | -4(1)  |
| Cl(02) | 54(1)  | 56(1) | 39(1)  | -13(1) | -20(1) | -2(1)  |
| Cl(03) | 51(1)  | 60(2) | 53(2)  | -11(1) | -17(1) | 3(1)   |
| Cl(00) | 110(3) | 74(2) | 109(3) | -7(2)  | -60(2) | -7(2)  |
| F(005) | 70(4)  | 66(4) | 38(3)  | -14(3) | -24(3) | -1(3)  |
| F(006) | 58(3)  | 53(3) | 44(3)  | 0(3)   | -13(3) | -7(3)  |
| F(007) | 51(4)  | 86(4) | 38(3)  | -4(3)  | -2(3)  | -12(3) |
| F(008) | 88(4)  | 84(4) | 32(3)  | -17(3) | -18(3) | -21(4) |

|        |        |        |        |         |        |        |
|--------|--------|--------|--------|---------|--------|--------|
| F(009) | 111(5) | 56(4)  | 38(3)  | 3(3)    | -25(3) | 17(4)  |
| F(00A) | 64(4)  | 47(3)  | 64(4)  | 9(3)    | -18(3) | -5(3)  |
| F(00B) | 71(4)  | 62(4)  | 86(5)  | -7(3)   | -47(4) | 13(3)  |
| O(00C) | 53(4)  | 48(4)  | 39(4)  | -17(3)  | -16(3) | 9(3)   |
| F(00D) | 109(5) | 79(4)  | 34(3)  | -25(3)  | -12(3) | 38(4)  |
| F(00E) | 73(4)  | 96(5)  | 48(4)  | -17(3)  | -22(3) | 45(4)  |
| F(00F) | 47(3)  | 89(5)  | 72(4)  | -10(4)  | -6(3)  | 17(3)  |
| N(00G) | 38(4)  | 40(4)  | 24(3)  | -11(3)  | -11(3) | 6(3)   |
| N(00H) | 33(3)  | 38(4)  | 27(4)  | -13(3)  | -9(3)  | 6(3)   |
| N(00I) | 34(4)  | 43(4)  | 22(3)  | -7(3)   | -6(3)  | 0(3)   |
| N(00J) | 36(4)  | 38(4)  | 30(4)  | -9(3)   | -12(3) | 7(3)   |
| N(00K) | 41(4)  | 43(4)  | 29(4)  | -13(3)  | -10(3) | 10(3)  |
| N(00L) | 36(4)  | 44(4)  | 35(4)  | -14(3)  | -14(3) | 15(3)  |
| F(00N) | 108(5) | 73(4)  | 53(4)  | -24(3)  | -25(4) | 52(4)  |
| N(00O) | 43(4)  | 40(4)  | 32(4)  | -15(3)  | -17(3) | 11(3)  |
| N(00P) | 38(4)  | 46(4)  | 24(4)  | -8(3)   | -10(3) | 5(3)   |
| N(00Q) | 41(4)  | 39(4)  | 27(4)  | -8(3)   | -11(3) | 5(3)   |
| N(00R) | 41(4)  | 38(4)  | 28(4)  | -12(3)  | -11(3) | 6(3)   |
| N(00S) | 42(4)  | 48(4)  | 22(4)  | -11(3)  | -11(3) | 7(3)   |
| N(00T) | 42(4)  | 39(4)  | 23(4)  | -5(3)   | -6(3)  | 8(3)   |
| N(00U) | 36(4)  | 44(4)  | 32(4)  | -16(3)  | -11(3) | 11(3)  |
| N(00V) | 41(4)  | 42(4)  | 31(4)  | -12(3)  | -12(3) | 6(3)   |
| N(00W) | 36(4)  | 40(4)  | 34(4)  | -13(3)  | -12(3) | 4(3)   |
| N(00X) | 43(4)  | 41(4)  | 23(3)  | -9(3)   | -13(3) | 5(3)   |
| N(00Y) | 39(4)  | 46(4)  | 28(4)  | -9(3)   | -13(3) | 5(3)   |
| N(00Z) | 35(4)  | 46(4)  | 23(3)  | -10(3)  | -9(3)  | 10(3)  |
| N(010) | 40(4)  | 51(5)  | 29(4)  | -17(3)  | -4(3)  | 7(3)   |
| N(011) | 44(4)  | 42(4)  | 24(4)  | -6(3)   | -10(3) | 8(3)   |
| N(012) | 48(4)  | 51(5)  | 17(3)  | -12(3)  | -10(3) | 15(4)  |
| N(013) | 41(4)  | 41(4)  | 18(3)  | -6(3)   | -5(3)  | 4(3)   |
| N(014) | 39(4)  | 38(4)  | 26(4)  | -10(3)  | -10(3) | 10(3)  |
| N(015) | 34(4)  | 37(4)  | 28(4)  | -13(3)  | -5(3)  | 2(3)   |
| N(016) | 53(5)  | 38(4)  | 28(4)  | -5(3)   | -15(3) | 7(4)   |
| N(017) | 43(4)  | 40(4)  | 25(4)  | -9(3)   | -10(3) | 8(3)   |
| N(018) | 46(4)  | 39(4)  | 24(4)  | -10(3)  | -11(3) | 4(3)   |
| N(019) | 38(4)  | 38(4)  | 31(4)  | -14(3)  | -14(3) | 12(3)  |
| N(01A) | 42(4)  | 42(4)  | 38(4)  | -10(3)  | -18(3) | 8(3)   |
| F(01C) | 67(4)  | 114(6) | 146(7) | -103(6) | -31(4) | 22(4)  |
| N(01D) | 50(4)  | 46(4)  | 30(4)  | -14(3)  | -14(3) | 9(4)   |
| N(01E) | 48(4)  | 65(5)  | 28(4)  | -20(4)  | -10(3) | 12(4)  |
| O(01F) | 76(5)  | 82(5)  | 58(5)  | -25(4)  | -20(4) | -28(4) |
| N(01G) | 60(5)  | 38(4)  | 23(4)  | -5(3)   | -11(3) | 6(3)   |
| O(01H) | 69(5)  | 64(5)  | 44(4)  | -16(4)  | -15(4) | 16(4)  |
| N(01I) | 41(4)  | 49(4)  | 36(4)  | -18(3)  | -8(3)  | 0(3)   |

|        |        |        |       |        |        |        |
|--------|--------|--------|-------|--------|--------|--------|
| N(01J) | 56(5)  | 46(5)  | 34(4) | -14(3) | -13(4) | 16(4)  |
| N(01K) | 58(5)  | 46(4)  | 28(4) | -10(3) | -14(3) | 19(4)  |
| N(01L) | 53(5)  | 60(5)  | 24(4) | -17(3) | -9(3)  | 12(4)  |
| N(01M) | 50(4)  | 44(4)  | 21(3) | -6(3)  | -15(3) | 7(4)   |
| O(01N) | 94(6)  | 62(5)  | 77(6) | -26(4) | -60(5) | 36(4)  |
| N(01O) | 60(5)  | 47(5)  | 32(4) | -6(3)  | -18(4) | 7(4)   |
| N(01P) | 42(4)  | 57(5)  | 37(4) | -11(4) | -11(3) | 18(4)  |
| N(01Q) | 49(4)  | 48(5)  | 35(4) | -15(3) | -9(3)  | 3(4)   |
| N(01R) | 52(4)  | 55(5)  | 22(4) | -13(3) | -14(3) | 14(4)  |
| N(01T) | 58(5)  | 49(5)  | 43(5) | -20(4) | -21(4) | 20(4)  |
| N(01U) | 48(5)  | 62(5)  | 35(4) | -17(4) | -13(3) | 13(4)  |
| O(01V) | 59(4)  | 108(6) | 33(4) | -23(4) | -2(3)  | 32(4)  |
| O(01W) | 86(6)  | 85(6)  | 68(5) | -43(4) | -2(4)  | -33(5) |
| O(01X) | 56(4)  | 81(5)  | 96(6) | -40(5) | -37(4) | 14(4)  |
| N(01Z) | 50(5)  | 57(5)  | 32(4) | -7(4)  | -10(3) | 28(4)  |
| O(020) | 105(6) | 70(5)  | 43(4) | -12(4) | -14(4) | -15(5) |
| C(021) | 29(4)  | 44(5)  | 25(4) | -10(4) | -4(3)  | -6(4)  |
| C(023) | 33(4)  | 40(5)  | 26(4) | -10(4) | -9(3)  | 4(4)   |
| C(024) | 36(4)  | 37(5)  | 27(4) | -9(4)  | -9(3)  | 1(4)   |
| C(025) | 33(4)  | 36(5)  | 30(4) | -9(4)  | -10(3) | -4(4)  |
| O(026) | 75(5)  | 70(5)  | 55(5) | -2(4)  | -22(4) | 5(4)   |
| C(027) | 33(4)  | 43(5)  | 34(5) | -12(4) | -16(4) | 2(4)   |
| C(028) | 34(4)  | 40(5)  | 33(4) | -10(4) | -11(4) | -5(4)  |
| N(029) | 80(6)  | 59(5)  | 38(5) | -17(4) | -31(4) | 19(5)  |
| C(02A) | 38(5)  | 44(5)  | 37(5) | -18(4) | -17(4) | 3(4)   |
| C(02B) | 30(4)  | 45(5)  | 25(4) | -11(4) | -8(3)  | 0(4)   |
| C(02C) | 39(5)  | 33(5)  | 30(4) | -7(3)  | -10(4) | 1(4)   |
| C(02D) | 37(4)  | 47(5)  | 23(4) | -13(4) | -7(3)  | 3(4)   |
| C(02E) | 40(5)  | 37(5)  | 28(4) | -6(4)  | -14(4) | 1(4)   |
| C(02F) | 47(5)  | 43(5)  | 27(4) | -11(4) | -12(4) | 2(4)   |
| C(02G) | 41(5)  | 45(5)  | 33(5) | -15(4) | -16(4) | 3(4)   |
| C(02H) | 38(5)  | 35(5)  | 34(5) | -13(4) | -7(4)  | 9(4)   |
| C(02I) | 43(5)  | 38(5)  | 39(5) | -18(4) | -16(4) | 1(4)   |
| C(02K) | 40(5)  | 38(5)  | 36(5) | -15(4) | -9(4)  | 9(4)   |
| C(02L) | 33(4)  | 37(5)  | 30(5) | -4(4)  | -7(3)  | 1(4)   |
| C(02M) | 32(4)  | 44(5)  | 23(4) | -7(4)  | -10(3) | 5(4)   |
| C(02N) | 41(5)  | 43(5)  | 28(4) | -4(4)  | -13(4) | 2(4)   |
| C(02O) | 36(4)  | 40(5)  | 26(4) | -7(4)  | -12(3) | 6(4)   |
| O(02P) | 66(6)  | 99(7)  | 76(6) | -8(5)  | -10(4) | 26(5)  |
| C(02Q) | 43(5)  | 44(5)  | 32(5) | -9(4)  | -18(4) | 7(4)   |
| C(02R) | 41(5)  | 49(6)  | 46(6) | -12(5) | -17(4) | 6(4)   |
| C(02S) | 52(6)  | 61(7)  | 27(5) | -1(4)  | -14(4) | 4(5)   |
| C(02T) | 51(6)  | 61(7)  | 40(5) | -20(5) | -17(4) | 13(5)  |
| C(02U) | 32(5)  | 62(6)  | 32(5) | -7(5)  | -1(4)  | 11(4)  |

|        |        |        |         |         |        |        |
|--------|--------|--------|---------|---------|--------|--------|
| O(02V) | 88(7)  | 76(7)  | 68(7)   | -2(5)   | -56(5) | -23(5) |
| O(02W) | 77(5)  | 81(5)  | 39(4)   | -8(3)   | -14(4) | 0(5)   |
| O(02X) | 68(5)  | 59(5)  | 63(6)   | -18(5)  | -18(4) | 16(4)  |
| O(02Y) | 57(6)  | 69(5)  | 64(5)   | -22(4)  | -7(5)  | 12(5)  |
| O(02Z) | 92(7)  | 74(6)  | 87(7)   | -9(5)   | -58(6) | -15(6) |
| O(030) | 101(7) | 64(6)  | 81(6)   | -5(5)   | -73(6) | 4(6)   |
| O(031) | 66(5)  | 83(6)  | 70(5)   | -11(5)  | -17(4) | -19(5) |
| O(1)   | 74(5)  | 62(4)  | 66(5)   | -15(4)  | -28(4) | 4(4)   |
| O(2)   | 51(3)  | 77(5)  | 72(5)   | -26(4)  | -21(3) | -12(4) |
| O(3)   | 86(5)  | 44(7)  | 87(7)   | -17(6)  | -78(5) | -7(6)  |
| N(30)  | 52(5)  | 47(5)  | 33(4)   | -11(3)  | -16(3) | 8(4)   |
| O(5)   | 63(5)  | 63(5)  | 57(5)   | -12(4)  | -24(4) | -12(5) |
| O(4)   | 68(5)  | 67(5)  | 56(5)   | -17(5)  | -14(4) | 4(4)   |
| O(10)  | 69(5)  | 77(6)  | 54(5)   | -14(5)  | -34(4) | -10(5) |
| O(33)  | 106(5) | 60(6)  | 90(6)   | -15(6)  | -72(5) | -8(5)  |
| C(1)   | 78(10) | 90(12) | 178(18) | -67(12) | 45(11) | -9(9)  |
| O(7)   | 58(4)  | 65(5)  | 66(6)   | -13(5)  | -2(4)  | 10(5)  |
| O(9)   | 62(5)  | 82(6)  | 70(6)   | -2(5)   | -26(4) | -1(5)  |
| O(8)   | 73(6)  | 60(4)  | 70(5)   | -22(4)  | -3(5)  | -2(4)  |
| O(6)   | 83(6)  | 69(5)  | 84(7)   | -15(5)  | -58(6) | -14(5) |
| O(11)  | 103(7) | 68(5)  | 89(7)   | -11(5)  | -73(7) | -6(6)  |

Table S4 Bond Lengths for **4**.

| Atom   | Atom   | Length/Å  | Atom   | Atom   | Length/Å  |
|--------|--------|-----------|--------|--------|-----------|
| Cl(01) | O(01V) | 1.411(7)  | N(00Y) | C(02M) | 1.355(10) |
| Cl(01) | O(01W) | 1.441(8)  | N(00Z) | N(012) | 1.434(9)  |
| Cl(01) | O(01X) | 1.415(7)  | N(00Z) | C(01Y) | 1.411(10) |
| Cl(01) | O(020) | 1.425(8)  | N(00Z) | C(023) | 1.353(10) |
| Cl(02) | O(01F) | 1.399(7)  | N(010) | H(010) | 0.88      |
| Cl(02) | O(02W) | 1.434(10) | N(010) | C(02H) | 1.327(10) |
| Cl(02) | O(1)   | 1.377(12) | N(011) | N(01L) | 1.410(10) |
| Cl(02) | O(2)   | 1.451(10) | N(011) | C(024) | 1.368(10) |
| Cl(02) | O(5)   | 1.47(2)   | N(011) | C(02N) | 1.389(10) |
| Cl(02) | O(4)   | 1.48(3)   | N(012) | H(012) | 0.88      |
| Cl(02) | O(10)  | 1.36(2)   | N(012) | C(02D) | 1.271(11) |
| Cl(03) | O(026) | 1.429(7)  | N(013) | C(027) | 1.343(10) |
| Cl(03) | O(02X) | 1.352(17) | N(013) | C(028) | 1.340(10) |
| Cl(03) | O(02Y) | 1.408(17) | N(014) | C(023) | 1.354(10) |
| Cl(03) | O(031) | 1.390(17) | N(014) | C(02D) | 1.364(10) |
| Cl(03) | O(7)   | 1.432(15) | N(015) | C(021) | 1.364(10) |
| Cl(03) | O(9)   | 1.404(17) | N(015) | C(025) | 1.306(10) |
| Cl(03) | O(8)   | 1.445(16) | N(016) | C(02N) | 1.263(11) |

|        |        |           |        |        |           |
|--------|--------|-----------|--------|--------|-----------|
| Cl(00) | O(02V) | 1.406(10) | N(017) | H(017) | 0.88      |
| Cl(00) | O(02Z) | 1.45(2)   | N(017) | C(02A) | 1.331(10) |
| Cl(00) | O(030) | 1.416(15) | N(017) | C(02G) | 1.355(11) |
| Cl(00) | O(3)   | 1.482(18) | N(018) | C(02A) | 1.332(10) |
| Cl(00) | O(33)  | 1.435(18) | N(018) | C(02J) | 1.362(11) |
| Cl(00) | O(6)   | 1.458(15) | N(019) | C(022) | 1.405(10) |
| Cl(00) | O(11)  | 1.53(11)  | N(019) | C(02F) | 1.373(11) |
| F(005) | C(02T) | 1.340(11) | N(01A) | H(01G) | 0.88      |
| F(006) | C(02T) | 1.302(12) | N(01A) | C(02L) | 1.283(10) |
| F(007) | C(02S) | 1.324(11) | N(01B) | C(021) | 1.340(10) |
| F(008) | C(02S) | 1.323(12) | N(01B) | C(02B) | 1.323(10) |
| F(009) | C(02S) | 1.317(11) | F(01C) | C(02U) | 1.312(12) |
| F(00A) | C(02R) | 1.313(10) | N(01D) | C(02G) | 1.336(11) |
| F(00B) | C(02R) | 1.326(11) | N(01D) | C(02J) | 1.350(11) |
| O(00C) | H(00C) | 0.87      | N(01E) | C(023) | 1.316(10) |
| O(00C) | H(00D) | 0.87      | N(01G) | C(02K) | 1.320(10) |
| F(00D) | C(02T) | 1.303(11) | O(01H) | H(01U) | 0.87      |
| F(00E) | C(02U) | 1.330(11) | O(01H) | H(01V) | 0.87      |
| F(00F) | C(02U) | 1.320(10) | N(01I) | H(01Q) | 0.8847    |
| N(00G) | C(01Y) | 1.308(10) | N(01I) | H(01R) | 0.8848    |
| N(00G) | C(028) | 1.363(10) | N(01I) | C(021) | 1.363(10) |
| N(00H) | N(00T) | 1.411(9)  | N(01J) | H(01A) | 0.88      |
| N(00H) | C(025) | 1.412(10) | N(01J) | H(01B) | 0.88      |
| N(00H) | C(02O) | 1.355(10) | N(01J) | C(02F) | 1.276(11) |
| N(00I) | C(01Y) | 1.321(10) | N(01K) | H(01H) | 0.88      |
| N(00I) | C(027) | 1.360(10) | N(01K) | H(01I) | 0.88      |
| N(00J) | N(016) | 1.382(9)  | N(01K) | C(02G) | 1.331(11) |
| N(00J) | C(024) | 1.374(11) | N(01L) | H(01S) | 0.8808    |
| N(00J) | C(02O) | 1.352(10) | N(01L) | H(01T) | 0.8808    |
| N(00K) | H(00A) | 0.88      | N(01M) | H(01M) | 0.88      |
| N(00K) | H(00B) | 0.88      | N(01M) | C(02C) | 1.286(11) |
| N(00K) | C(028) | 1.333(10) | O(01N) | H(01W) | 0.87      |
| N(00L) | H(00L) | 0.88      | O(01N) | H(01X) | 0.87      |
| N(00L) | N(019) | 1.425(9)  | N(01O) | C(02B) | 1.348(11) |
| N(00L) | C(02M) | 1.288(10) | N(01P) | H(01C) | 0.88      |
| N(00M) | C(022) | 1.314(10) | N(01P) | H(01D) | 0.88      |
| N(00M) | C(02I) | 1.350(10) | N(01P) | C(02E) | 1.310(11) |
| F(00N) | C(02R) | 1.302(11) | N(01Q) | H(01J) | 0.8816    |
| N(00O) | N(01M) | 1.418(9)  | N(01Q) | H(01K) | 0.8817    |
| N(00O) | C(02A) | 1.383(11) | N(01Q) | C(02J) | 1.340(10) |
| N(00O) | C(02K) | 1.363(10) | N(01R) | H(01O) | 0.88      |
| N(00P) | C(025) | 1.329(10) | N(01R) | H(01P) | 0.88      |
| N(00P) | C(02B) | 1.351(10) | N(01R) | C(027) | 1.335(10) |
| N(00Q) | N(01U) | 1.396(9)  | N(01T) | C(02O) | 1.314(11) |

|        |        |           |        |        |           |
|--------|--------|-----------|--------|--------|-----------|
| N(00Q) | C(02C) | 1.379(11) | N(01U) | H(01L) | 0.8803    |
| N(00Q) | C(02L) | 1.369(10) | N(01U) | H(01N) | 0.8803    |
| N(00R) | N(01A) | 1.386(10) | N(01Z) | H(01E) | 0.8811    |
| N(00R) | C(02C) | 1.360(10) | N(01Z) | H(01F) | 0.881     |
| N(00R) | C(02K) | 1.366(10) | N(029) | H(02A) | 0.8839    |
| N(00S) | N(010) | 1.380(9)  | N(029) | H(02B) | 0.8841    |
| N(00S) | C(02F) | 1.363(10) | C(02H) | C(02T) | 1.504(12) |
| N(00S) | C(02M) | 1.365(11) | C(02I) | N(30)  | 1.360(11) |
| N(00T) | H(00T) | 0.88      | C(02L) | C(02U) | 1.489(12) |
| N(00T) | C(024) | 1.275(10) | C(02N) | C(02S) | 1.510(12) |
| N(00U) | H(00U) | 0.88      | O(02P) | H(02P) | 0.84      |
| N(00U) | N(014) | 1.397(9)  | O(02P) | C(1)   | 1.46(2)   |
| N(00U) | C(02Q) | 1.301(10) | C(02Q) | C(02R) | 1.486(12) |
| N(00V) | C(022) | 1.316(10) | O(02V) | O(02Z) | 1.33(8)   |
| N(00V) | C(02E) | 1.326(10) | O(02Z) | C(1)#1 | 1.28(9)   |
| N(00W) | C(02E) | 1.356(10) | N(30)  | H(30A) | 0.8816    |
| N(00W) | C(02I) | 1.329(10) | N(30)  | H(30B) | 0.8817    |
| N(00X) | N(029) | 1.412(9)  | C(1)   | H(1A)  | 0.98      |
| N(00X) | C(02D) | 1.372(10) | C(1)   | H(1B)  | 0.981     |
| N(00X) | C(02Q) | 1.372(11) | C(1)   | H(1C)  | 0.9801    |
| N(00Y) | N(01Z) | 1.413(9)  | C(1)   | O(6)#2 | 1.60(3)   |
| N(00Y) | C(02H) | 1.360(10) |        |        |           |

Table S5 Bond Angles for 4.

| Atom   | Atom   | Atom   | Angle/°   | Atom   | Atom   | Atom   | Angle/°  |
|--------|--------|--------|-----------|--------|--------|--------|----------|
| O(01V) | Cl(01) | O(01W) | 110.8(5)  | C(02E) | N(01P) | H(01C) | 120      |
| O(01V) | Cl(01) | O(01X) | 109.2(5)  | C(02E) | N(01P) | H(01D) | 120      |
| O(01V) | Cl(01) | O(020) | 111.3(5)  | H(01J) | N(01Q) | H(01K) | 109.2    |
| O(01X) | Cl(01) | O(01W) | 106.9(5)  | C(02J) | N(01Q) | H(01J) | 109.5    |
| O(01X) | Cl(01) | O(020) | 109.3(5)  | C(02J) | N(01Q) | H(01K) | 109.5    |
| O(020) | Cl(01) | O(01W) | 109.3(5)  | H(01O) | N(01R) | H(01P) | 120      |
| O(01F) | Cl(02) | O(02W) | 105.5(6)  | C(027) | N(01R) | H(01O) | 119.9    |
| O(01F) | Cl(02) | O(2)   | 106.8(6)  | C(027) | N(01R) | H(01P) | 120.1    |
| O(01F) | Cl(02) | O(5)   | 108.0(10) | N(00Q) | N(01U) | H(01L) | 109.3    |
| O(01F) | Cl(02) | O(4)   | 100.8(11) | N(00Q) | N(01U) | H(01N) | 109.1    |
| O(02W) | Cl(02) | O(2)   | 105.1(7)  | H(01L) | N(01U) | H(01N) | 109.4    |
| O(1)   | Cl(02) | O(01F) | 114.3(6)  | N(00G) | C(01Y) | N(00Z) | 117.6(7) |
| O(1)   | Cl(02) | O(02W) | 110.9(7)  | N(00I) | C(01Y) | N(00G) | 130.0(7) |
| O(1)   | Cl(02) | O(2)   | 113.5(7)  | N(00I) | C(01Y) | N(00Z) | 112.4(7) |
| O(5)   | Cl(02) | O(4)   | 81.5(14)  | N(00Y) | N(01Z) | H(01E) | 110      |
| O(10)  | Cl(02) | O(01F) | 134.1(11) | N(00Y) | N(01Z) | H(01F) | 108.5    |
| O(10)  | Cl(02) | O(5)   | 112.6(14) | H(01E) | N(01Z) | H(01F) | 109.2    |

|        |        |        |           |        |        |        |          |
|--------|--------|--------|-----------|--------|--------|--------|----------|
| O(10)  | Cl(02) | O(4)   | 105.5(15) | N(01B) | C(021) | N(015) | 124.6(7) |
| O(026) | Cl(03) | O(8)   | 113.9(8)  | N(01B) | C(021) | N(01I) | 119.1(7) |
| O(02X) | Cl(03) | O(026) | 111.5(8)  | N(01I) | C(021) | N(015) | 116.4(7) |
| O(02X) | Cl(03) | O(02Y) | 112.6(10) | N(00M) | C(022) | N(00V) | 129.8(8) |
| O(02X) | Cl(03) | O(031) | 114.8(12) | N(00M) | C(022) | N(019) | 115.7(7) |
| O(02Y) | Cl(03) | O(026) | 112.5(8)  | N(00V) | C(022) | N(019) | 114.5(7) |
| O(031) | Cl(03) | O(026) | 98.6(8)   | N(014) | C(023) | N(00Z) | 103.0(7) |
| O(031) | Cl(03) | O(02Y) | 105.9(11) | N(01E) | C(023) | N(00Z) | 130.4(8) |
| O(7)   | Cl(03) | O(026) | 112.4(7)  | N(01E) | C(023) | N(014) | 126.5(8) |
| O(7)   | Cl(03) | O(8)   | 103.1(10) | N(00T) | C(024) | N(00J) | 113.7(7) |
| O(9)   | Cl(03) | O(026) | 109.9(8)  | N(00T) | C(024) | N(011) | 141.8(8) |
| O(9)   | Cl(03) | O(7)   | 116.5(11) | N(011) | C(024) | N(00J) | 104.4(7) |
| O(9)   | Cl(03) | O(8)   | 100.3(11) | N(00P) | C(025) | N(00H) | 114.6(7) |
| O(02V) | Cl(00) | O(02Z) | 55(3)     | N(015) | C(025) | N(00H) | 115.3(7) |
| O(02V) | Cl(00) | O(030) | 117(2)    | N(015) | C(025) | N(00P) | 130.1(7) |
| O(02V) | Cl(00) | O(3)   | 105.2(12) | N(013) | C(027) | N(00I) | 123.5(7) |
| O(02Z) | Cl(00) | O(3)   | 96(4)     | N(01R) | C(027) | N(00I) | 117.4(7) |
| O(030) | Cl(00) | O(02Z) | 154(4)    | N(01R) | C(027) | N(013) | 119.1(7) |
| O(030) | Cl(00) | O(3)   | 109.9(19) | N(00K) | C(028) | N(00G) | 117.2(7) |
| O(33)  | Cl(00) | O(6)   | 110.7(19) | N(013) | C(028) | N(00G) | 125.2(8) |
| O(33)  | Cl(00) | O(11)  | 80(7)     | N(013) | C(028) | N(00K) | 117.3(7) |
| O(6)   | Cl(00) | O(11)  | 131(10)   | N(00X) | N(029) | H(02A) | 109      |
| H(00C) | O(00C) | H(00D) | 104.5     | N(00X) | N(029) | H(02B) | 110      |
| C(01Y) | N(00G) | C(028) | 111.9(7)  | H(02A) | N(029) | H(02B) | 108.9    |
| N(00T) | N(00H) | C(025) | 120.7(6)  | N(017) | C(02A) | N(00O) | 117.6(7) |
| C(02O) | N(00H) | N(00T) | 113.3(6)  | N(018) | C(02A) | N(00O) | 114.4(7) |
| C(02O) | N(00H) | C(025) | 126.0(7)  | N(018) | C(02A) | N(017) | 128.0(8) |
| C(01Y) | N(00I) | C(027) | 113.4(7)  | N(01B) | C(02B) | N(00P) | 125.7(7) |
| C(024) | N(00J) | N(016) | 112.8(7)  | N(01B) | C(02B) | N(01O) | 119.8(7) |
| C(02O) | N(00J) | N(016) | 139.0(7)  | N(01O) | C(02B) | N(00P) | 114.5(7) |
| C(02O) | N(00J) | C(024) | 108.2(6)  | N(00R) | C(02C) | N(00Q) | 103.8(7) |
| H(00A) | N(00K) | H(00B) | 120       | N(01M) | C(02C) | N(00Q) | 141.2(8) |
| C(028) | N(00K) | H(00A) | 120       | N(01M) | C(02C) | N(00R) | 114.9(7) |
| C(028) | N(00K) | H(00B) | 120       | N(012) | C(02D) | N(00X) | 141.4(8) |
| N(019) | N(00L) | H(00L) | 129.1     | N(012) | C(02D) | N(014) | 115.7(7) |
| C(02M) | N(00L) | H(00L) | 129.2     | N(014) | C(02D) | N(00X) | 102.9(7) |
| C(02M) | N(00L) | N(019) | 101.7(6)  | N(00V) | C(02E) | N(00W) | 125.7(8) |
| C(022) | N(00M) | C(02I) | 112.5(7)  | N(01P) | C(02E) | N(00V) | 117.0(7) |
| C(02A) | N(00O) | N(01M) | 120.4(7)  | N(01P) | C(02E) | N(00W) | 117.3(7) |
| C(02K) | N(00O) | N(01M) | 113.6(6)  | N(00S) | C(02F) | N(019) | 102.3(7) |
| C(02K) | N(00O) | C(02A) | 124.9(7)  | N(01J) | C(02F) | N(00S) | 127.0(8) |
| C(025) | N(00P) | C(02B) | 111.8(7)  | N(01J) | C(02F) | N(019) | 130.8(8) |
| C(02C) | N(00Q) | N(01U) | 127.3(7)  | N(01D) | C(02G) | N(017) | 125.3(8) |
| C(02L) | N(00Q) | N(01U) | 126.2(7)  | N(01K) | C(02G) | N(017) | 117.4(7) |

|        |        |        |          |        |        |        |          |
|--------|--------|--------|----------|--------|--------|--------|----------|
| C(02L) | N(00Q) | C(02C) | 105.5(6) | N(01K) | C(02G) | N(01D) | 117.4(8) |
| C(02C) | N(00R) | N(01A) | 113.5(7) | N(00Y) | C(02H) | C(02T) | 123.5(7) |
| C(02C) | N(00R) | C(02K) | 108.0(7) | N(010) | C(02H) | N(00Y) | 114.3(7) |
| C(02K) | N(00R) | N(01A) | 138.5(7) | N(010) | C(02H) | C(02T) | 122.2(7) |
| C(02F) | N(00S) | N(010) | 137.1(7) | N(00M) | C(02I) | N(30)  | 116.6(8) |
| C(02F) | N(00S) | C(02M) | 109.3(7) | N(00W) | C(02I) | N(00M) | 125.1(8) |
| C(02M) | N(00S) | N(010) | 113.1(6) | N(00W) | C(02I) | N(30)  | 118.3(8) |
| N(00H) | N(00T) | H(00T) | 129.1    | N(01D) | C(02J) | N(018) | 123.5(8) |
| C(024) | N(00T) | N(00H) | 101.7(6) | N(01Q) | C(02J) | N(018) | 117.2(7) |
| C(024) | N(00T) | H(00T) | 129.1    | N(01Q) | C(02J) | N(01D) | 119.3(8) |
| N(014) | N(00U) | H(00U) | 129.8    | N(00O) | C(02K) | N(00R) | 102.7(7) |
| C(02Q) | N(00U) | H(00U) | 129.8    | N(01G) | C(02K) | N(00O) | 130.8(8) |
| C(02Q) | N(00U) | N(014) | 100.4(7) | N(01G) | C(02K) | N(00R) | 126.6(8) |
| C(022) | N(00V) | C(02E) | 112.3(7) | N(00Q) | C(02L) | C(02U) | 122.0(7) |
| C(02I) | N(00W) | C(02E) | 114.4(7) | N(01A) | C(02L) | N(00Q) | 115.5(8) |
| C(02D) | N(00X) | N(029) | 125.3(7) | N(01A) | C(02L) | C(02U) | 122.5(8) |
| C(02Q) | N(00X) | N(029) | 127.7(7) | N(00L) | C(02M) | N(00S) | 113.7(7) |
| C(02Q) | N(00X) | C(02D) | 106.8(6) | N(00L) | C(02M) | N(00Y) | 141.4(8) |
| C(02H) | N(00Y) | N(01Z) | 122.1(7) | N(00Y) | C(02M) | N(00S) | 104.9(7) |
| C(02H) | N(00Y) | C(02M) | 106.4(7) | N(011) | C(02N) | C(02S) | 120.2(8) |
| C(02M) | N(00Y) | N(01Z) | 131.2(7) | N(016) | C(02N) | N(011) | 116.0(7) |
| C(01Y) | N(00Z) | N(012) | 120.4(6) | N(016) | C(02N) | C(02S) | 123.7(8) |
| C(023) | N(00Z) | N(012) | 113.5(6) | N(00H) | C(02O) | N(00J) | 103.0(7) |
| C(023) | N(00Z) | C(01Y) | 126.1(7) | N(01T) | C(02O) | N(00H) | 131.5(8) |
| N(00S) | N(010) | H(010) | 129.4    | N(01T) | C(02O) | N(00J) | 125.4(7) |
| C(02H) | N(010) | N(00S) | 101.2(7) | C(1)   | O(02P) | H(02P) | 109      |
| C(02H) | N(010) | H(010) | 129.4    | N(00U) | C(02Q) | N(00X) | 115.1(7) |
| C(024) | N(011) | N(01L) | 130.5(7) | N(00U) | C(02Q) | C(02R) | 121.2(8) |
| C(024) | N(011) | C(02N) | 104.5(7) | N(00X) | C(02Q) | C(02R) | 123.6(8) |
| C(02N) | N(011) | N(01L) | 125.0(7) | F(00A) | C(02R) | C(02Q) | 112.0(7) |
| N(00Z) | N(012) | H(012) | 130      | F(00B) | C(02R) | F(00A) | 105.7(8) |
| C(02D) | N(012) | N(00Z) | 100.0(6) | F(00B) | C(02R) | C(02Q) | 110.6(8) |
| C(02D) | N(012) | H(012) | 130      | F(00N) | C(02R) | F(00A) | 108.1(8) |
| C(028) | N(013) | C(027) | 115.8(7) | F(00N) | C(02R) | F(00B) | 108.0(8) |
| C(023) | N(014) | N(00U) | 137.5(7) | F(00N) | C(02R) | C(02Q) | 112.1(8) |
| C(023) | N(014) | C(02D) | 107.7(7) | F(007) | C(02S) | C(02N) | 110.9(8) |
| C(02D) | N(014) | N(00U) | 114.7(7) | F(008) | C(02S) | F(007) | 107.9(9) |
| C(025) | N(015) | C(021) | 112.3(7) | F(008) | C(02S) | F(009) | 108.8(8) |
| C(02N) | N(016) | N(00J) | 102.2(6) | F(008) | C(02S) | C(02N) | 112.0(8) |
| C(02A) | N(017) | H(017) | 123.4    | F(009) | C(02S) | F(007) | 107.6(8) |
| C(02A) | N(017) | C(02G) | 113.1(7) | F(009) | C(02S) | C(02N) | 109.6(8) |
| C(02G) | N(017) | H(017) | 123.5    | F(005) | C(02T) | C(02H) | 108.4(8) |
| C(02A) | N(018) | C(02J) | 114.0(7) | F(006) | C(02T) | F(005) | 108.4(8) |
| C(022) | N(019) | N(00L) | 120.1(6) | F(006) | C(02T) | F(00D) | 110.1(8) |

|        |        |        |          |          |        |        |           |
|--------|--------|--------|----------|----------|--------|--------|-----------|
| C(02F) | N(019) | N(00L) | 113.1(6) | F(006)   | C(02T) | C(02H) | 112.4(8)  |
| C(02F) | N(019) | C(022) | 126.2(7) | F(00D)   | C(02T) | F(005) | 106.7(9)  |
| N(00R) | N(01A) | H(01G) | 129.2    | F(00D)   | C(02T) | C(02H) | 110.7(8)  |
| C(02L) | N(01A) | N(00R) | 101.6(7) | F(00E)   | C(02U) | C(02L) | 110.0(8)  |
| C(02L) | N(01A) | H(01G) | 129.2    | F(00F)   | C(02U) | F(00E) | 105.4(8)  |
| C(02B) | N(01B) | C(021) | 115.5(7) | F(00F)   | C(02U) | F(01C) | 107.4(9)  |
| C(02G) | N(01D) | C(02J) | 116.0(7) | F(00F)   | C(02U) | C(02L) | 113.4(8)  |
| H(01U) | O(01H) | H(01V) | 104.5    | F(01C)   | C(02U) | F(00E) | 109.3(9)  |
| H(01Q) | N(01I) | H(01R) | 108.9    | F(01C)   | C(02U) | C(02L) | 111.2(8)  |
| C(021) | N(01I) | H(01Q) | 109.7    | Cl(00)   | O(02V) | O(02Z) | 64.1(19)  |
| C(021) | N(01I) | H(01R) | 109.7    | C(02I)   | N(30)  | H(30A) | 109       |
| H(01A) | N(01J) | H(01B) | 120      | C(02I)   | N(30)  | H(30B) | 109.4     |
| C(02F) | N(01J) | H(01A) | 120      | H(30A)   | N(30)  | H(30B) | 109.2     |
| C(02F) | N(01J) | H(01B) | 120      | O(02P)   | C(1)   | H(1A)  | 108.4     |
| H(01H) | N(01K) | H(01I) | 120      | O(02P)   | C(1)   | H(1B)  | 111       |
| C(02G) | N(01K) | H(01H) | 119.9    | O(02P)   | C(1)   | H(1C)  | 110.4     |
| C(02G) | N(01K) | H(01I) | 120.1    | O(02P)   | C(1)   | O(6)#2 | 137.7(14) |
| N(011) | N(01L) | H(01S) | 109.2    | O(02Z)#2 | C(1)   | O(02P) | 110(2)    |
| N(011) | N(01L) | H(01T) | 109.3    | O(02Z)#2 | C(1)   | O(6)#2 | 55(4)     |
| H(01S) | N(01L) | H(01T) | 109.4    | H(1A)    | C(1)   | H(1B)  | 108.9     |
| N(00O) | N(01M) | H(01M) | 129.6    | H(1A)    | C(1)   | H(1C)  | 109.2     |
| C(02C) | N(01M) | N(00O) | 100.7(6) | H(1B)    | C(1)   | H(1C)  | 108.8     |
| C(02C) | N(01M) | H(01M) | 129.6    | O(6)#2   | C(1)   | H(1A)  | 112.5     |
| H(01W) | O(01N) | H(01X) | 109.5    | O(6)#2   | C(1)   | H(1B)  | 45        |
| H(01C) | N(01P) | H(01D) | 120      | O(6)#2   | C(1)   | H(1C)  | 65.4      |

Table S6 Torsion Angles for **4**.

| A      | B      | C      | D      | Angle/°   | A      | B      | C      | D      | Angle/°   |
|--------|--------|--------|--------|-----------|--------|--------|--------|--------|-----------|
| N(00H) | N(00T) | C(024) | N(00J) | 1.9(9)    | C(023) | N(00Z) | N(012) | C(02D) | 2.0(9)    |
| N(00H) | N(00T) | C(024) | N(011) | 178.3(11) | C(023) | N(00Z) | C(01Y) | N(00G) | -166.3(8) |
| N(00J) | N(016) | C(02N) | N(011) | 1.3(10)   | C(023) | N(00Z) | C(01Y) | N(00I) | 14.0(12)  |
| N(00J) | N(016) | C(02N) | C(02S) | -177.8(8) | C(023) | N(014) | C(02D) | N(00X) | 178.5(6)  |
| N(00L) | N(019) | C(022) | N(00M) | 179.5(7)  | C(023) | N(014) | C(02D) | N(012) | -2.0(11)  |
| N(00L) | N(019) | C(022) | N(00V) | 0.5(11)   | C(024) | N(00J) | N(016) | C(02N) | 0.3(9)    |
| N(00L) | N(019) | C(02F) | N(00S) | -1.7(9)   | C(024) | N(00J) | C(02O) | N(00H) | 0.4(9)    |
| N(00L) | N(019) | C(02F) | N(01J) | 179.4(9)  | C(024) | N(00J) | C(02O) | N(01T) | 179.7(9)  |
| N(00O) | N(01M) | C(02C) | N(00Q) | 176.5(11) | C(024) | N(011) | C(02N) | N(016) | -2.3(11)  |
| N(00O) | N(01M) | C(02C) | N(00R) | -2.2(9)   | C(024) | N(011) | C(02N) | C(02S) | 176.7(8)  |
| N(00Q) | C(02L) | C(02U) | F(00E) | 164.4(8)  | C(025) | N(00H) | N(00T) | C(024) | 179.3(7)  |

|        |        |        |        |            |        |        |        |        |           |
|--------|--------|--------|--------|------------|--------|--------|--------|--------|-----------|
| N(00Q) | C(02L) | C(02U) | F(00F) | 46.8(13)   | C(025) | N(00H) | C(02O) | N(00J) | 179.7(7)  |
| N(00Q) | C(02L) | C(02U) | F(01C) | -74.4(11)  | C(025) | N(00H) | C(02O) | N(01T) | 0.4(15)   |
| N(00R) | N(01A) | C(02L) | N(00Q) | 2.7(10)    | C(025) | N(00P) | C(02B) | N(01B) | 2.7(12)   |
| N(00R) | N(01A) | C(02L) | C(02U) | -178.5(8)  | C(025) | N(00P) | C(02B) | N(01O) | -177.4(7) |
| N(00S) | N(010) | C(02H) | N(00Y) | 0.0(10)    | C(025) | N(015) | C(021) | N(01B) | 1.8(12)   |
| N(00S) | N(010) | C(02H) | C(02T) | -179.4(8)  | C(025) | N(015) | C(021) | N(01I) | -179.1(7) |
| N(00T) | N(00H) | C(025) | N(00P) | 2.8(11)    | C(027) | N(00I) | C(01Y) | N(00G) | 0.5(13)   |
| N(00T) | N(00H) | C(025) | N(015) | -176.5(7)  | C(027) | N(00I) | C(01Y) | N(00Z) | -179.9(7) |
| N(00T) | N(00H) | C(02O) | N(00J) | 0.8(9)     | C(027) | N(013) | C(028) | N(00G) | 3.7(12)   |
| N(00T) | N(00H) | C(02O) | N(01T) | -178.5(9)  | C(027) | N(013) | C(028) | N(00K) | 178.3(7)  |
| N(00U) | N(014) | C(023) | N(00Z) | -180.0(9)  | C(028) | N(00G) | C(01Y) | N(00I) | 2.3(12)   |
| N(00U) | N(014) | C(023) | N(01E) | 0.2(16)    | C(028) | N(00G) | C(01Y) | N(00Z) | -177.3(7) |
| N(00U) | N(014) | C(02D) | N(00X) | 0.7(9)     | C(028) | N(013) | C(027) | N(00I) | -0.3(12)  |
| N(00U) | N(014) | C(02D) | N(012) | -179.8(7)  | C(028) | N(013) | C(027) | N(01R) | 179.2(8)  |
| N(00U) | C(02Q) | C(02R) | F(00A) | 125.5(10)  | N(029) | N(00X) | C(02D) | N(012) | 4.5(18)   |
| N(00U) | C(02Q) | C(02R) | F(00B) | -116.9(10) | N(029) | N(00X) | C(02D) | N(014) | -176.2(8) |
| N(00U) | C(02Q) | C(02R) | F(00N) | 3.7(13)    | N(029) | N(00X) | C(02Q) | N(00U) | 175.6(8)  |
| N(00X) | C(02Q) | C(02R) | F(00A) | -55.0(12)  | N(029) | N(00X) | C(02Q) | C(02R) | -3.9(14)  |
| N(00X) | C(02Q) | C(02R) | F(00B) | 62.6(11)   | C(02A) | N(00O) | N(01M) | C(02C) | 170.7(8)  |
| N(00X) | C(02Q) | C(02R) | F(00N) | -176.7(8)  | C(02A) | N(00O) | C(02K) | N(00R) | -169.1(8) |
| N(00Y) | C(02H) | C(02T) | F(005) | 61.4(12)   | C(02A) | N(00O) | C(02K) | N(01G) | 10.8(15)  |
| N(00Y) | C(02H) | C(02T) | F(006) | -58.3(12)  | C(02A) | N(017) | C(02G) | N(01D) | 0.6(12)   |
| N(00Y) | C(02H) | C(02T) | F(00D) | 178.1(8)   | C(02A) | N(017) | C(02G) | N(01K) | -179.6(8) |
| N(00Z) | N(012) | C(02D) | N(00X) | 179.3(11)  | C(02A) | N(018) | C(02J) | N(01D) | 2.2(12)   |
| N(00Z) | N(012) | C(02D) | N(014) | 0.1(10)    | C(02A) | N(018) | C(02J) | N(01Q) | -177.4(7) |
| N(010) | N(00S) | C(02F) | N(019) | 172.8(9)   | C(02B) | N(00P) | C(025) | N(00H) | -179.7(7) |
| N(010) | N(00S) | C(02F) | N(01J) | -8.2(17)   | C(02B) | N(00P) | C(025) | N(015) | -0.5(13)  |
| N(010) | N(00S) | C(02M) | N(00L) | -175.2(7)  | C(02B) | N(01B) | C(021) | N(015) | 0.0(12)   |
| N(010) | N(00S) | C(02M) | N(00Y) | 3.0(9)     | C(02B) | N(01B) | C(021) | N(01I) | -179.1(7) |
| N(010) | C(02H) | C(02T) | F(005) | -119.2(9)  | C(02C) | N(00Q) | C(02L) | N(01A) | -2.7(10)  |
| N(010) | C(02H) | C(02T) | F(006) | 121.1(9)   | C(02C) | N(00Q) | C(02L) | C(02U) | 178.5(8)  |
| N(010) | C(02H) | C(02T) | F(00D) | -2.5(13)   | C(02C) | N(00R) | N(01A) | C(02L) | -1.8(9)   |
| N(011) | C(02N) | C(02S) | F(007) | -55.7(12)  | C(02C) | N(00R) | C(02K) | N(00O) | -0.5(9)   |
| N(011) | C(02N) | C(02S) | F(008) | 64.9(11)   | C(02C) | N(00R) | C(02K) | N(01G) | 179.5(9)  |
| N(011) | C(02N) | C(02S) | F(009) | -174.2(8)  | C(02D) | N(00X) | C(02Q) | N(00U) | -0.2(10)  |

|        |        |        |        |            |        |        |        |        |            |
|--------|--------|--------|--------|------------|--------|--------|--------|--------|------------|
| N(012) | N(00Z) | C(01Y) | N(00G) | 10.3(11)   | C(02D) | N(00X) | C(02Q) | C(02R) | -179.8(8)  |
| N(012) | N(00Z) | C(01Y) | N(00I) | -169.4(7)  | C(02D) | N(014) | C(023) | N(00Z) | 3.0(9)     |
| N(012) | N(00Z) | C(023) | N(014) | -3.1(9)    | C(02D) | N(014) | C(023) | N(01E) | -176.9(8)  |
| N(012) | N(00Z) | C(023) | N(01E) | 176.7(9)   | C(02E) | N(00V) | C(022) | N(00M) | 1.4(13)    |
| N(014) | N(00U) | C(02Q) | N(00X) | 0.6(9)     | C(02E) | N(00V) | C(022) | N(019) | -179.8(7)  |
| N(014) | N(00U) | C(02Q) | C(02R) | -179.9(8)  | C(02E) | N(00W) | C(02I) | N(00M) | -0.9(12)   |
| N(016) | N(00J) | C(024) | N(00T) | 176.0(7)   | C(02E) | N(00W) | C(02I) | N(30)  | 177.6(8)   |
| N(016) | N(00J) | C(024) | N(011) | -1.7(9)    | C(02F) | N(00S) | N(010) | C(02H) | -172.3(10) |
| N(016) | N(00J) | C(02O) | N(00H) | -176.3(9)  | C(02F) | N(00S) | C(02M) | N(00L) | -2.1(10)   |
| N(016) | N(00J) | C(02O) | N(01T) | 3.1(17)    | C(02F) | N(00S) | C(02M) | N(00Y) | 176.1(7)   |
| N(016) | C(02N) | C(02S) | F(007) | 123.3(10)  | C(02F) | N(019) | C(022) | N(00M) | -9.8(12)   |
| N(016) | C(02N) | C(02S) | F(008) | -116.1(10) | C(02F) | N(019) | C(022) | N(00V) | 171.2(8)   |
| N(016) | C(02N) | C(02S) | F(009) | 4.8(14)    | C(02G) | N(017) | C(02A) | N(00O) | -177.8(7)  |
| N(019) | N(00L) | C(02M) | N(00S) | 0.9(9)     | C(02G) | N(017) | C(02A) | N(018) | 2.3(13)    |
| N(019) | N(00L) | C(02M) | N(00Y) | -176.3(11) | C(02G) | N(01D) | C(02J) | N(018) | 0.2(13)    |
| N(01A) | N(00R) | C(02C) | N(00Q) | 0.3(9)     | C(02G) | N(01D) | C(02J) | N(01Q) | 179.8(8)   |
| N(01A) | N(00R) | C(02C) | N(01M) | 179.5(7)   | C(02H) | N(00Y) | C(02M) | N(00L) | 174.6(12)  |
| N(01A) | N(00R) | C(02K) | N(00O) | -177.2(9)  | C(02H) | N(00Y) | C(02M) | N(00S) | -2.8(9)    |
| N(01A) | N(00R) | C(02K) | N(01G) | 2.9(17)    | C(02I) | N(00M) | C(022) | N(00V) | 0.7(13)    |
| N(01A) | C(02L) | C(02U) | F(00E) | -14.3(13)  | C(02I) | N(00M) | C(022) | N(019) | -178.1(7)  |
| N(01A) | C(02L) | C(02U) | F(00F) | -132.0(9)  | C(02I) | N(00W) | C(02E) | N(00V) | 3.5(12)    |
| N(01A) | C(02L) | C(02U) | F(01C) | 106.9(11)  | C(02I) | N(00W) | C(02E) | N(01P) | -176.8(8)  |
| N(01L) | N(011) | C(024) | N(00J) | -176.9(8)  | C(02J) | N(018) | C(02A) | N(00O) | 176.4(7)   |
| N(01L) | N(011) | C(024) | N(00T) | 6.6(19)    | C(02J) | N(018) | C(02A) | N(017) | -3.7(13)   |
| N(01L) | N(011) | C(02N) | N(016) | 176.8(8)   | C(02J) | N(01D) | C(02G) | N(017) | -1.7(13)   |
| N(01L) | N(011) | C(02N) | C(02S) | -4.1(13)   | C(02J) | N(01D) | C(02G) | N(01K) | 178.5(8)   |
| N(01M) | N(00O) | C(02A) | N(017) | -2.4(12)   | C(02K) | N(00O) | N(01M) | C(02C) | 1.9(9)     |
| N(01M) | N(00O) | C(02A) | N(018) | 177.5(7)   | C(02K) | N(00O) | C(02A) | N(017) | 165.1(8)   |
| N(01M) | N(00O) | C(02K) | N(00R) | -0.8(9)    | C(02K) | N(00O) | C(02A) | N(018) | -15.0(12)  |
| N(01M) | N(00O) | C(02K) | N(01G) | 179.1(9)   | C(02K) | N(00R) | N(01A) | C(02L) | 174.7(10)  |
| N(01U) | N(00Q) | C(02C) | N(00R) | 170.2(8)   | C(02K) | N(00R) | C(02C) | N(00Q) | -177.3(7)  |
| N(01U) | N(00Q) | C(02C) | N(01M) | -8.6(18)   | C(02K) | N(00R) | C(02C) | N(01M) | 1.9(10)    |
| N(01U) | N(00Q) | C(02L) | N(01A) | -171.8(8)  | C(02L) | N(00Q) | C(02C) | N(00R) | 1.3(9)     |
| N(01U) | N(00Q) | C(02L) | C(02U) | 9.4(14)    | C(02L) | N(00Q) | C(02C) | N(01M) | -177.6(11) |
| C(01Y) | N(00G) | C(028) | N(00K) | -179.1(7)  | C(02M) | N(00L) | N(019) | C(022) | 172.4(7)   |

|        |        |        |        |           |        |        |        |        |            |
|--------|--------|--------|--------|-----------|--------|--------|--------|--------|------------|
| C(01Y) | N(00G) | C(028) | N(013) | -4.5(12)  | C(02M) | N(00L) | N(019) | C(02F) | 0.5(9)     |
| C(01Y) | N(00I) | C(027) | N(013) | -1.6(12)  | C(02M) | N(00S) | N(010) | C(02H) | -1.9(9)    |
| C(01Y) | N(00I) | C(027) | N(01R) | 178.8(7)  | C(02M) | N(00S) | C(02F) | N(019) | 2.1(9)     |
| C(01Y) | N(00Z) | N(012) | C(02D) | -175.0(7) | C(02M) | N(00S) | C(02F) | N(01J) | -178.9(9)  |
| C(01Y) | N(00Z) | C(023) | N(014) | 173.7(7)  | C(02M) | N(00Y) | C(02H) | N(010) | 1.8(10)    |
| C(01Y) | N(00Z) | C(023) | N(01E) | -6.5(15)  | C(02M) | N(00Y) | C(02H) | C(02T) | -178.8(8)  |
| N(01Z) | N(00Y) | C(02H) | N(010) | 176.4(8)  | C(02N) | N(011) | C(024) | N(00J) | 2.2(9)     |
| N(01Z) | N(00Y) | C(02H) | C(02T) | -4.2(13)  | C(02N) | N(011) | C(024) | N(00T) | -174.3(11) |
| N(01Z) | N(00Y) | C(02M) | N(00L) | 0.7(18)   | C(02O) | N(00H) | N(00T) | C(024) | -1.7(9)    |
| N(01Z) | N(00Y) | C(02M) | N(00S) | -176.7(8) | C(02O) | N(00H) | C(025) | N(00P) | -176.0(7)  |
| C(021) | N(015) | C(025) | N(00H) | 177.7(7)  | C(02O) | N(00H) | C(025) | N(015) | 4.7(12)    |
| C(021) | N(015) | C(025) | N(00P) | -1.5(13)  | C(02O) | N(00J) | N(016) | C(02N) | 176.8(10)  |
| C(021) | N(01B) | C(02B) | N(00P) | -2.5(12)  | C(02O) | N(00J) | C(024) | N(00T) | -1.6(10)   |
| C(021) | N(01B) | C(02B) | N(01O) | 177.6(8)  | C(02O) | N(00J) | C(024) | N(011) | -179.3(7)  |
| C(022) | N(00M) | C(02I) | N(00W) | -1.0(12)  | C(02Q) | N(00U) | N(014) | C(023) | -177.7(10) |
| C(022) | N(00M) | C(02I) | N(30)  | -179.5(7) | C(02Q) | N(00U) | N(014) | C(02D) | -0.8(9)    |
| C(022) | N(00V) | C(02E) | N(00W) | -3.7(12)  | C(02Q) | N(00X) | C(02D) | N(012) | -179.6(12) |
| C(022) | N(00V) | C(02E) | N(01P) | 176.6(8)  | C(02Q) | N(00X) | C(02D) | N(014) | -0.3(9)    |
| C(022) | N(019) | C(02F) | N(00S) | -172.9(8) | O(030) | Cl(00) | O(02V) | O(02Z) | -151(5)    |
| C(022) | N(019) | C(02F) | N(01J) | 8.1(15)   | O(3)   | Cl(00) | O(02V) | O(02Z) | 86(5)      |

Table S7 Hydrogen Atom Coordinates ( $\text{\AA} \times 10^4$ ) and Isotropic Displacement Parameters ( $\text{\AA}^2 \times 10^3$ ) for **4**.

| Atom   | x     | y    | z      | $U(eq)$ |
|--------|-------|------|--------|---------|
| H(00C) | 12432 | 6615 | -7458  | 70      |
| H(00D) | 12555 | 5675 | -7334  | 70      |
| H(00A) | 11794 | -793 | -4276  | 46      |
| H(00B) | 11568 | -97  | -5073  | 46      |
| H(00L) | 14246 | 519  | -5644  | 47      |
| H(00T) | 14123 | 393  | -9353  | 46      |
| H(00U) | 6992  | 4176 | -3952  | 45      |
| H(010) | 11724 | 1787 | -3384  | 50      |
| H(012) | 9289  | 2001 | -5462  | 48      |
| H(017) | 16219 | 5456 | -10067 | 45      |
| H(01G) | 19209 | 1987 | -8986  | 49      |
| H(01U) | 10298 | 3445 | -3885  | 93      |
| H(01V) | 10748 | 2765 | -3347  | 93      |

|        |       |       |        |     |
|--------|-------|-------|--------|-----|
| H(01Q) | 10772 | 2173  | -6789  | 51  |
| H(01R) | 10402 | 1300  | -6102  | 51  |
| H(01A) | 11610 | 2984  | -4962  | 57  |
| H(01B) | 12102 | 3190  | -5940  | 57  |
| H(01H) | 14432 | 6992  | -9426  | 55  |
| H(01I) | 15192 | 6776  | -10215 | 55  |
| H(01S) | 14843 | 261   | -11182 | 56  |
| H(01T) | 15059 | 939   | -12042 | 56  |
| H(01M) | 17249 | 4601  | -10589 | 47  |
| H(01W) | 11476 | -2174 | -2372  | 107 |
| H(01X) | 11596 | -1487 | -3202  | 107 |
| H(01C) | 15913 | 1215  | -8176  | 59  |
| H(01D) | 15865 | 1969  | -9015  | 59  |
| H(01J) | 13951 | 4848  | -6755  | 54  |
| H(01K) | 14539 | 3995  | -6647  | 54  |
| H(01O) | 9859  | -740  | -1539  | 53  |
| H(01P) | 9024  | 6     | -1443  | 53  |
| H(01L) | 19177 | 2968  | -11752 | 59  |
| H(01N) | 18660 | 3848  | -11781 | 59  |
| H(01E) | 13513 | -1036 | -3217  | 63  |
| H(01F) | 14388 | -626  | -3979  | 63  |
| H(02A) | 8711  | 3428  | -6691  | 69  |
| H(02B) | 7624  | 3644  | -6577  | 69  |
| H(02P) | 10750 | 3548  | -7673  | 138 |
| H(30A) | 13268 | 4057  | -8899  | 54  |
| H(30B) | 12469 | 3996  | -8083  | 54  |
| H(1A)  | 10478 | 4699  | -8660  | 199 |
| H(1B)  | 9372  | 4197  | -8352  | 199 |
| H(1C)  | 10336 | 4001  | -9116  | 199 |

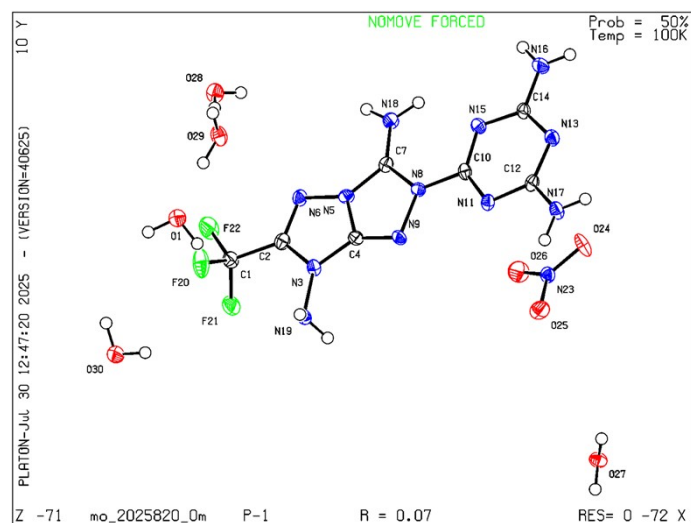

Figure S2. Single-crystal X-ray structures of 5.

Table S8 Fractional Atomic Coordinates ( $\times 10^4$ ) and Equivalent Isotropic Displacement Parameters ( $\text{\AA}^2 \times 10^3$ ) for **5**.  $U_{eq}$  is defined as 1/3 of the trace of the orthogonalised  $U_{ij}$  tensor.

| Atom  | x        | y       | z       | $U(eq)$ |
|-------|----------|---------|---------|---------|
| F(21) | 1375(3)  | 2201(3) | 1710(1) | 27(1)   |
| F(22) | 3157(3)  | 1866(3) | 785(1)  | 39(1)   |
| F(20) | 2942(3)  | 4321(3) | 1300(2) | 36(1)   |
| O(27) | 1951(3)  | -13(3)  | 8674(2) | 19(1)   |
| O(29) | 7402(3)  | 5453(3) | 1034(2) | 22(1)   |
| O(28) | 7427(4)  | 2434(3) | 162(2)  | 22(1)   |
| O(1)  | 5184(3)  | 7701(3) | 1213(2) | 22(1)   |
| O(30) | 235(3)   | 7827(3) | 994(2)  | 24(1)   |
| O(24) | 8293(3)  | 746(3)  | 7226(2) | 31(1)   |
| O(26) | 6203(4)  | 68(3)   | 6141(2) | 30(1)   |
| O(25) | 6221(4)  | 2136(3) | 7116(2) | 27(1)   |
| N(5)  | 6472(4)  | 2285(3) | 3066(2) | 16(1)   |
| N(9)  | 6612(4)  | 3548(3) | 4467(2) | 16(1)   |
| N(19) | 3035(4)  | 4311(4) | 3417(2) | 19(1)   |
| N(11) | 9159(4)  | 3746(3) | 5835(2) | 16(1)   |
| N(23) | 6936(4)  | 983(3)  | 6833(2) | 17(1)   |
| N(3)  | 4328(4)  | 3505(3) | 3156(2) | 16(1)   |
| N(8)  | 8014(4)  | 2738(3) | 4362(2) | 15(1)   |
| N(17) | 10435(4) | 4767(3) | 7272(2) | 19(1)   |
| N(6)  | 5542(4)  | 1939(3) | 2201(2) | 17(1)   |
| N(15) | 10619(4) | 2134(3) | 4915(2) | 17(1)   |
| N(13) | 11850(4) | 3130(4) | 6450(2) | 18(1)   |
| N(18) | 8960(4)  | 1112(3) | 3168(2) | 19(1)   |
| N(16) | 13185(4) | 1591(4) | 5535(2) | 23(1)   |
| C(1)  | 2920(5)  | 2761(4) | 1518(2) | 19(1)   |
| C(4)  | 5769(4)  | 3220(4) | 3654(2) | 15(1)   |
| C(10) | 9350(4)  | 2879(4) | 5091(2) | 15(1)   |
| C(14) | 11865(5) | 2311(4) | 5643(2) | 16(1)   |
| C(12) | 10484(5) | 3849(4) | 6506(2) | 17(1)   |
| C(2)  | 4270(5)  | 2695(4) | 2296(2) | 18(1)   |
| C(7)  | 7925(4)  | 1958(4) | 3505(2) | 15(1)   |

Table S9 Anisotropic Displacement Parameters ( $\text{\AA}^2 \times 10^3$ ) for **5**. The Anisotropic displacement factor exponent takes the form:  $-2\pi^2[h^2a^*U_{11}+2hka^*b^*U_{12}+\dots]$ .

| Atom  | x     | y     | z     | $U(eq)$ |
|-------|-------|-------|-------|---------|
| F(21) | 18(1) | 34(1) | 27(1) | 6(1)    |
| F(22) | 38(2) | 61(2) | 19(1) | -14(1)  |
| F(20) | 46(2) | 25(1) | 33(1) | 14(1)   |
| O(27) | 17(1) | 18(1) | 22(1) | -2(1)   |
| O(29) | 26(2) | 17(1) | 24(1) | 2(1)    |
| O(28) | 30(2) | 16(1) | 22(1) | 2(1)    |

|       |       |       |       |       |
|-------|-------|-------|-------|-------|
| O(1)  | 22(2) | 25(1) | 21(1) | 2(1)  |
| O(30) | 23(2) | 29(2) | 21(1) | 2(1)  |
| O(24) | 25(2) | 34(2) | 34(2) | 7(1)  |
| O(26) | 29(2) | 32(2) | 27(1) | -7(1) |
| O(25) | 37(2) | 23(1) | 27(1) | 4(1)  |
| N(5)  | 18(2) | 16(2) | 14(1) | -3(1) |
| N(9)  | 17(2) | 18(2) | 17(1) | 2(1)  |
| N(19) | 22(2) | 21(2) | 18(2) | -1(1) |
| N(11) | 21(2) | 15(1) | 13(1) | 2(1)  |
| N(23) | 18(2) | 16(2) | 17(2) | 4(1)  |
| N(3)  | 18(2) | 14(1) | 14(1) | 0(1)  |
| N(8)  | 18(2) | 16(2) | 15(1) | 1(1)  |
| N(17) | 22(2) | 19(2) | 17(2) | -1(1) |
| N(6)  | 20(2) | 19(2) | 13(1) | -1(1) |
| N(15) | 18(2) | 16(2) | 19(2) | 4(1)  |
| N(13) | 20(2) | 18(2) | 18(2) | 3(1)  |
| N(18) | 21(2) | 21(2) | 15(1) | -4(1) |
| N(16) | 22(2) | 31(2) | 20(2) | 1(1)  |
| C(1)  | 20(2) | 20(2) | 16(2) | -3(1) |
| C(4)  | 17(2) | 13(2) | 17(2) | 1(1)  |
| C(10) | 17(2) | 12(2) | 16(2) | 4(1)  |
| C(14) | 18(2) | 15(2) | 17(2) | 6(1)  |
| C(12) | 22(2) | 12(2) | 16(2) | 6(1)  |
| C(2)  | 20(2) | 18(2) | 16(2) | 1(1)  |
| C(7)  | 19(2) | 13(2) | 14(2) | 1(1)  |

Table S10 Bond Lengths for **5**.

| <b>Atom</b> | <b>Atom</b> | <b>Length/Å</b> | <b>Atom</b> | <b>Atom</b> | <b>Length/Å</b> |
|-------------|-------------|-----------------|-------------|-------------|-----------------|
| F(21)       | C(1)        | 1.330(4)        | N(19)       | H(19B)      | 0.874(19)       |
| F(22)       | C(1)        | 1.324(4)        | N(11)       | C(10)       | 1.314(4)        |
| F(20)       | C(1)        | 1.333(4)        | N(11)       | C(12)       | 1.355(5)        |
| O(27)       | H(27A)      | 0.87            | N(3)        | C(4)        | 1.362(4)        |
| O(27)       | H(27B)      | 0.87            | N(3)        | C(2)        | 1.390(4)        |
| O(29)       | H(29A)      | 0.87            | N(8)        | C(10)       | 1.414(4)        |
| O(29)       | H(29B)      | 0.87            | N(8)        | C(7)        | 1.372(4)        |
| O(28)       | H(28A)      | 0.87            | N(17)       | H(17A)      | 0.88            |
| O(28)       | H(28B)      | 0.77(5)         | N(17)       | H(17B)      | 0.88            |
| O(1)        | H(1A)       | 0.87            | N(17)       | C(12)       | 1.330(4)        |
| O(1)        | H(1B)       | 0.87            | N(6)        | C(2)        | 1.306(4)        |
| O(30)       | H(30A)      | 0.87            | N(15)       | C(10)       | 1.325(4)        |
| O(30)       | H(30B)      | 0.87            | N(15)       | C(14)       | 1.363(4)        |
| O(24)       | N(23)       | 1.228(4)        | N(13)       | C(14)       | 1.336(4)        |
| O(26)       | N(23)       | 1.252(4)        | N(13)       | C(12)       | 1.347(5)        |
| O(25)       | N(23)       | 1.264(4)        | N(18)       | H(18A)      | 0.88            |

|       |        |          |       |        |           |
|-------|--------|----------|-------|--------|-----------|
| N(5)  | N(6)   | 1.389(4) | N(18) | H(18B) | 0.88      |
| N(5)  | C(4)   | 1.363(4) | N(18) | C(7)   | 1.300(4)  |
| N(5)  | C(7)   | 1.347(4) | N(16) | H(16A) | 0.88      |
| N(9)  | N(8)   | 1.428(4) | N(16) | H(16B) | 0.88      |
| N(9)  | C(4)   | 1.296(4) | N(16) | C(14)  | 1.326(4)  |
| N(19) | H(19A) | 0.8827   | C(1)  | C(2)   | 1.495(5)  |
| N(19) | N(3)   | 1.409(4) | N(19) | H(19B) | 0.874(19) |

Table S11 Bond Angles for **5**.

| Atom   | Atom  | Atom   | Angle/°  | Atom   | Atom  | Atom   | Angle/°  |
|--------|-------|--------|----------|--------|-------|--------|----------|
| H(27A) | O(27) | H(27B) | 104.5    | C(7)   | N(18) | H(18A) | 120      |
| H(29A) | O(29) | H(29B) | 104.5    | C(7)   | N(18) | H(18B) | 120      |
| H(28A) | O(28) | H(28B) | 116.5    | H(16A) | N(16) | H(16B) | 120      |
| H(1A)  | O(1)  | H(1B)  | 104.5    | C(14)  | N(16) | H(16A) | 120      |
| H(30A) | O(30) | H(30B) | 104.5    | C(14)  | N(16) | H(16B) | 120      |
| C(4)   | N(5)  | N(6)   | 113.9(3) | F(21)  | C(1)  | F(20)  | 106.7(3) |
| C(7)   | N(5)  | N(6)   | 137.5(3) | F(21)  | C(1)  | C(2)   | 112.9(3) |
| C(7)   | N(5)  | C(4)   | 108.6(3) | F(22)  | C(1)  | F(21)  | 108.0(3) |
| C(4)   | N(9)  | N(8)   | 100.2(3) | F(22)  | C(1)  | F(20)  | 108.0(3) |
| H(19A) | N(19) | H(19B) | 113.1    | F(22)  | C(1)  | C(2)   | 110.5(3) |
| N(3)   | N(19) | H(19A) | 109.9    | F(20)  | C(1)  | C(2)   | 110.6(3) |
| N(3)   | N(19) | H(19B) | 108(3)   | N(9)   | C(4)  | N(5)   | 114.8(3) |
| C(10)  | N(11) | C(12)  | 112.6(3) | N(9)   | C(4)  | N(3)   | 140.4(3) |
| O(24)  | N(23) | O(26)  | 120.6(3) | N(3)   | C(4)  | N(5)   | 104.7(3) |
| O(24)  | N(23) | O(25)  | 121.6(3) | N(11)  | C(10) | N(8)   | 115.3(3) |
| O(26)  | N(23) | O(25)  | 117.8(3) | N(11)  | C(10) | N(15)  | 129.8(3) |
| C(4)   | N(3)  | N(19)  | 130.5(3) | N(15)  | C(10) | N(8)   | 114.9(3) |
| C(4)   | N(3)  | C(2)   | 105.5(3) | N(13)  | C(14) | N(15)  | 125.3(3) |
| C(2)   | N(3)  | N(19)  | 123.8(3) | N(16)  | C(14) | N(15)  | 116.7(3) |
| C(10)  | N(8)  | N(9)   | 119.5(3) | N(16)  | C(14) | N(13)  | 118.0(3) |
| C(7)   | N(8)  | N(9)   | 113.3(3) | N(17)  | C(12) | N(11)  | 116.8(3) |
| C(7)   | N(8)  | C(10)  | 127.1(3) | N(17)  | C(12) | N(13)  | 117.9(3) |
| H(17A) | N(17) | H(17B) | 120      | N(13)  | C(12) | N(11)  | 125.3(3) |
| C(12)  | N(17) | H(17A) | 120      | N(3)   | C(2)  | C(1)   | 123.1(3) |
| C(12)  | N(17) | H(17B) | 120      | N(6)   | C(2)  | N(3)   | 114.8(3) |
| C(2)   | N(6)  | N(5)   | 101.1(3) | N(6)   | C(2)  | C(1)   | 122.0(3) |
| C(10)  | N(15) | C(14)  | 112.2(3) | N(5)   | C(7)  | N(8)   | 103.0(3) |
| C(14)  | N(13) | C(12)  | 114.7(3) | N(18)  | C(7)  | N(5)   | 126.8(3) |
| H(18A) | N(18) | H(18B) | 120      | N(18)  | C(7)  | N(8)   | 130.2(3) |

Table S12 Torsion Angles for **5**.

| A     | B    | C    | D    | Angle/°  | A    | B    | C    | D     | Angle/°  |
|-------|------|------|------|----------|------|------|------|-------|----------|
| F(21) | C(1) | C(2) | N(3) | -58.1(4) | C(4) | N(9) | N(8) | C(10) | 175.8(3) |

|       |      |       |       |           |       |       |       |       |           |
|-------|------|-------|-------|-----------|-------|-------|-------|-------|-----------|
| F(21) | C(1) | C(2)  | N(6)  | 125.7(4)  | C(4)  | N(9)  | N(8)  | C(7)  | -0.8(4)   |
| F(22) | C(1) | C(2)  | N(3)  | -179.2(3) | C(4)  | N(3)  | C(2)  | N(6)  | -0.6(4)   |
| F(22) | C(1) | C(2)  | N(6)  | 4.6(5)    | C(4)  | N(3)  | C(2)  | C(1)  | -177.0(3) |
| F(20) | C(1) | C(2)  | N(3)  | 61.3(4)   | C(10) | N(11) | C(12) | N(17) | 177.1(3)  |
| F(20) | C(1) | C(2)  | N(6)  | -114.9(4) | C(10) | N(11) | C(12) | N(13) | -1.3(5)   |
| N(5)  | N(6) | C(2)  | N(3)  | 0.4(4)    | C(10) | N(8)  | C(7)  | N(5)  | -175.9(3) |
| N(5)  | N(6) | C(2)  | C(1)  | 176.9(3)  | C(10) | N(8)  | C(7)  | N(18) | 3.7(6)    |
| N(9)  | N(8) | C(10) | N(11) | 1.4(4)    | C(10) | N(15) | C(14) | N(13) | 0.0(5)    |
| N(9)  | N(8) | C(10) | N(15) | -177.7(3) | C(10) | N(15) | C(14) | N(16) | 179.4(3)  |
| N(9)  | N(8) | C(7)  | N(5)  | 0.4(3)    | C(14) | N(15) | C(10) | N(11) | 1.2(5)    |
| N(9)  | N(8) | C(7)  | N(18) | 180.0(3)  | C(14) | N(15) | C(10) | N(8)  | -179.9(3) |
| N(19) | N(3) | C(4)  | N(5)  | 175.6(3)  | C(14) | N(13) | C(12) | N(11) | 2.3(5)    |
| N(19) | N(3) | C(4)  | N(9)  | -4.1(7)   | C(14) | N(13) | C(12) | N(17) | -176.1(3) |
| N(19) | N(3) | C(2)  | N(6)  | -176.2(3) | C(12) | N(11) | C(10) | N(8)  | -179.5(3) |
| N(19) | N(3) | C(2)  | C(1)  | 7.4(5)    | C(12) | N(11) | C(10) | N(15) | -0.6(5)   |
| N(8)  | N(9) | C(4)  | N(5)  | 0.9(4)    | C(12) | N(13) | C(14) | N(15) | -1.6(5)   |
| N(8)  | N(9) | C(4)  | N(3)  | -179.3(4) | C(12) | N(13) | C(14) | N(16) | 179.1(3)  |
| N(6)  | N(5) | C(4)  | N(9)  | 179.6(3)  | C(2)  | N(3)  | C(4)  | N(5)  | 0.4(3)    |
| N(6)  | N(5) | C(4)  | N(3)  | -0.2(4)   | C(2)  | N(3)  | C(4)  | N(9)  | -179.3(4) |
| N(6)  | N(5) | C(7)  | N(8)  | 179.6(3)  | C(7)  | N(5)  | N(6)  | C(2)  | -179.5(4) |
| N(6)  | N(5) | C(7)  | N(18) | 0.0(6)    | C(7)  | N(5)  | C(4)  | N(9)  | -0.8(4)   |
| C(4)  | N(5) | N(6)  | C(2)  | -0.1(4)   | C(7)  | N(5)  | C(4)  | N(3)  | 179.4(3)  |
| C(4)  | N(5) | C(7)  | N(8)  | 0.2(3)    | C(7)  | N(8)  | C(10) | N(11) | 177.4(3)  |
| C(4)  | N(5) | C(7)  | N(18) | -179.4(3) | C(7)  | N(8)  | C(10) | N(15) | -1.6(5)   |

Table S13 Hydrogen Atom Coordinates ( $\text{\AA}\times 10^4$ ) and Isotropic Displacement Parameters ( $\text{\AA}^2\times 10^3$ ) for **5**.

| Atom   | x     | y    | z    | $U(eq)$ |
|--------|-------|------|------|---------|
| H(27A) | 2899  | 687  | 8728 | 29      |
| H(27B) | 1255  | 544  | 8903 | 29      |
| H(29A) | 6568  | 6000 | 1023 | 34      |
| H(29B) | 8249  | 6174 | 914  | 34      |
| H(28A) | 7360  | 3401 | 418  | 34      |
| H(1A)  | 4338  | 7787 | 805  | 34      |
| H(1B)  | 4796  | 7792 | 1733 | 34      |
| H(30A) | 962   | 7729 | 617  | 36      |
| H(30B) | 840   | 8009 | 1531 | 36      |
| H(19A) | 2626  | 3848 | 3885 | 23      |
| H(17A) | 11279 | 4889 | 7721 | 23      |
| H(17B) | 9559  | 5253 | 7329 | 23      |
| H(18A) | 8737  | 685  | 2597 | 22      |
| H(18B) | 9883  | 965  | 3512 | 22      |

|        |          |          |          |        |
|--------|----------|----------|----------|--------|
| H(16A) | 14016    | 1662     | 5987     | 28     |
| H(16B) | 13229    | 1043     | 5011     | 28     |
| H(28B) | 7600(60) | 1760(60) | 490(30)  | 36(14) |
| H(19B) | 3450(60) | 5370(30) | 3530(30) | 50(15) |

## 2. Experimental

**Caution!** Proper safety precautions should be taken during the preparation, characterization, and handling of energetic materials. Lab personnel should be properly grounded. All the reactions and performance testing of the prepared materials were conducted in a protected fume hood and behind a safety shield. Face shields and leather gloves must be used.

### General methods

All reagents were purchased from Energy Chemical or Aladdin in analytical grade.  $^1\text{H}$  and  $^{13}\text{C}$  NMR spectra were recorded on Bruker AVANCE 400 nuclear magnetic resonance spectrometer. DMSO- $d_6$  was employed as a solvent and locking solvent. The onset decomposition temperature was measured using a TA Instruments DSC25 differential scanning calorimeter at a heating rate of  $10\text{ }^\circ\text{C min}^{-1}$  under dry nitrogen atmosphere. Infrared (IR) spectra were recorded on an FT-IR spectrometer (Thermo Nicolet AVATAR 370). Elemental analyses (C, H, N) were performed on a Vario Micro cube Elementar Analyzer. Impact and friction sensitivity measurements were made using a standard BAM Fallhammer and a BAM friction tester.

**6-(Trifluoromethyl)-7H-[1,2,4]triazolo[4,3-b][1,2,4]triazole-3,7-diamine (2):** Compound **2** was synthesized according to the literature method.<sup>1</sup>

**6-(7-Amino-3-imino-6-(trifluoromethyl)-3H-[1,2,4]triazolo[4,3-b][1,2,4]triazol-2(7H)-yl)-1,3,5-triazine-2,4-diamine (3):** 2-Chloro-4,6-diamino-1,3,5-triazine (0.146 g, 1.0 mmol) and compound **2** (0.207 g, 1.0 mmol) were charged into a 25 mL three-necked flask, followed by DMF (5 mL). The mixture was heated to reflux at  $120\text{ }^\circ\text{C}$  for 12 h under a condenser. Reaction progress was monitored by TLC. After completion of the reaction, the mixture turned orange-red, and a white precipitate formed. The mixture was allowed to cool to room temperature, and the solid was collected by filtration, washed with cold water, and dried to afford compound **3** as a white solid

(87.3% yield).  $T_d$  (onset): 253.48 °C.  $^1\text{H}$  NMR (400 MHz, DMSO- $d_6$ )  $\delta$  = 8.42(s, 1H), 7.03 (d, 2H), 6.81 (d, 2H), 6.10 (s, 2H);  $^{13}\text{C}$  NMR (DMSO- $d_6$ )  $\delta$  = 167.38, 163.96, 143.26, 109.46 ppm;  $^{19}\text{F}$  NMR (DMSO- $d_6$ )  $\delta$  = -64.41 ppm; IR (KBr):  $\tilde{\nu}$  = 3341(s), 3132(s), 2926(s), 1690(m), 1605(s), 1538(s), 1487(w), 1414(s), 1332(s), 1093(s), 1016(w), 975(m), 852(w), 821(s), 746(w), 720(s), 714(s)  $\text{cm}^{-1}$ ; Anal. calcd. for  $\text{C}_7\text{H}_7\text{F}_3\text{N}_{12}$ : C 26.59; H 2.23; N 53.16; found: C 26.68; H 2.10; N 53.09.

***7-Amino-2-(4,6-diamino-1,3,5-triazin-2-yl)-6-(trifluoromethyl)-2,7-dihydro-3H-***

***[1,2,4]triazolo[4,3-b][1,2,4]triazol-3-iminium perchlorate (4):*** Compound **3** (0.417 g, 1.0 mmol) was dispersed in water (5 mL) in a 25 mL three-necked flask. Aqueous  $\text{HClO}_4$  (70%) was added dropwise with stirring until the suspension became clear and transparent, indicating complete salt formation. The resulting solution was then subjected to recrystallization to afford compound **4** as a white solid (72.2% yield).  $T_d$  (onset): 241.38 °C.  $^1\text{H}$  NMR (400 MHz, DMSO- $d_6$ )  $\delta$  = 7.46 (d, 1H), 7.39 (d, 1H), 6.62 (s, 1H), 4.51 (s, 4H);  $^{13}\text{C}$  NMR (DMSO- $d_6$ )  $\delta$  = 167.18, 162.76, 148.36, 111.57 ppm;  $^{19}\text{F}$  NMR (DMSO- $d_6$ )  $\delta$  = -64.41, -65.53, ppm; IR (KBr):  $\tilde{\nu}$  = 3436(s), 3330(s), 3192(s), 1664(m), 1608(s), 1542(s), 1479(w), 1413(s), 1336(m), 1262(s), 1188(s), 1096(vs), 1032(m), 972(w), 826(s), 626(vs)  $\text{cm}^{-1}$ ; Anal. calcd. for  $\text{C}_7\text{H}_8\text{ClF}_3\text{N}_{12}\text{O}_4$ : C 20.18; H 1.94; N 40.34; found: C 20.04; H 2.07; N 40.26.

***7-Amino-2-(4,6-diamino-1,3,5-triazin-2-yl)-6-(trifluoromethyl)-2,7-dihydro-3H-***

***[1,2,4]triazolo[4,3-b][1,2,4]triazol-3-iminium nitrate (5):*** Compound **3** (0.417 g, 1.0 mmol) was dissolved in methanol (5 mL), followed by dropwise addition of 68% nitric acid. The mixture was stirred at room temperature for 12 h and then left undisturbed to give compound **5** as a white solid in 79.1% yield.  $T_d$  (onset): 241.21 °C.  $^1\text{H}$  NMR (400 MHz, DMSO- $d_6$ )  $\delta$  = 7.65 (d, 1H), 7.48 (d, 1H), 6.65 (s, 1H), 5.79 (s, 2H);  $^{19}\text{F}$  NMR (DMSO- $d_6$ )  $\delta$  = -64.47, -64.88 ppm; IR (KBr):  $\tilde{\nu}$  = 3447(m), 3337(m), 3281(m), 3210(m), 1701(s), 1679(s), 1638(m), 1553(s), 1485(w), 1466(w), 1424(m), 1379(vs), 1274(m), 1220(m), 1186(s), 1164(s), 1114(s), 838(w), 800(s), 777(w), 728(m)  $\text{cm}^{-1}$ ; Anal. calcd. for  $\text{C}_7\text{H}_8\text{F}_3\text{N}_{13}\text{O}_3$ : C, 22.17; H, 2.13; N, 48.02; found: C 21.09; H 2.17; N 47.89.

***2,2'-(6-Amino-1,3,5-triazine-2,4-diyl)bis(3-imino-6-(trifluoromethyl)-2,3-dihydro-7H-***

***[1,2,4]triazolo[4,3-b][1,2,4]triazol-7-amine (6):*** 4,6-Dichloro-1,3,5-triazine-2-amine (0.165 g, 1.0 mmol) and compound **2** (0.414 g, 2.0 mmol) were added sequentially to a 25 mL three-necked flask, followed by DMF (8 mL). The reaction mixture was heated at 120 °C under reflux for 12 h. Reaction progress was monitored by TLC, and after completion of the reaction, the solution turned orange-red

with the formation of a light-yellow precipitate. After cooling to room temperature, the solid was collected by filtration, washed with cold water, and dried to afford compound **6** as a pale yellow solid (78.6% yield).  $T_d$  (onset): 233.95 °C.  $^1\text{H}$  NMR (400 MHz, DMSO- $d_6$ )  $\delta$  = 8.53 (d, 2H), 8.37 (d, 2H), 6.67(d, 4H)  $^{19}\text{F}$  NMR (DMSO- $d_6$ )  $\delta$  = -64.17 ppm; IR (KBr):  $\tilde{\nu}$  = 3193(s), 3079(m), 1696(s), 1539(s), 1425(s), 1297(m), 1257(s), 1223(s), 1163(s), 1100(vs), 1034(m), 986(w), 838(m), 796(w), 729(w), 648(vs)  $\text{cm}^{-1}$ ; Anal. calcd. for  $\text{C}_{11}\text{H}_8\text{F}_6\text{N}_{18}$ : C 26.10; H 1.59; N 49.80. found: C 26.33; H 1.87; N 49.65.

### 3. Theoretical calculations

The calculations of the heats of formation were carried out using Gaussian 09 (Revision D.01) suite of programs. All the compounds were determined using isodesmic reactions (Scheme S1). The geometry optimization and frequency analyses of the structures were calculated using B3LYP/6-31+G\*\* level. Gas phase heats of formation of the title compounds were computed based on an isodesmic reaction. The enthalpy of reaction was carried out by combining the M062X/6-311++G\*\* energy difference for the reactions, the scaled zero-point energies (ZPE), values of thermal correction (HT), and other thermal factors.<sup>[2,3]</sup> The solid-state heats of formation were obtained by employing Trouton's rule according to equation 1 ( $T$  represents either melting point or decomposition temperature when no melting occurs prior to decomposition).

$$\Delta H_{sub} = 188 /J \text{ mol}^{-1} K^{-1} \times T \quad (1)$$

For energetic salts, the solid-phase heat of formation is calculated on basis of a Born-Haber energy cycle (Scheme S2). The number is simplified by equation 2:

$$\Delta H_f(\text{salt}, 298 \text{ K}) = \Delta H_f(\text{cation}, 298\text{K}) + \Delta H_f(\text{anion}, 298\text{K}) - \Delta H_L \quad (2)$$

in which  $\Delta H_L$  can be predicted by using the formula suggested by Jenkins, et al.(equation 3):

$$\Delta H_L = U_{pot} + [p(n_M/2 - 2) + q(n_X/2 - 2)]RT \quad (3)$$

In this equation,  $n_M$  and  $n_X$  depend on the nature of the ions  $\text{M}^+$  and  $\text{X}^-$ , respectively.

The equation for lattice potential energy  $U_{\text{pot}}$  (equation 4) has the form:

$$U_{\text{POT}} [\text{kJ mol}^{-1}] = \gamma(\rho_m/M_m)^{1/3} + \delta \quad (4)$$

where  $\rho_m$  [ $\text{g cm}^{-3}$ ] is the density of the salt,  $M_m$  is the chemical formula mass of the ionic material, and values for  $\gamma$  ( $\text{kJ mol}^{-1} \text{cm}$ ) and  $\delta$  ( $\text{kJ mol}^{-1}$ ) are assigned literature values.<sup>4</sup>

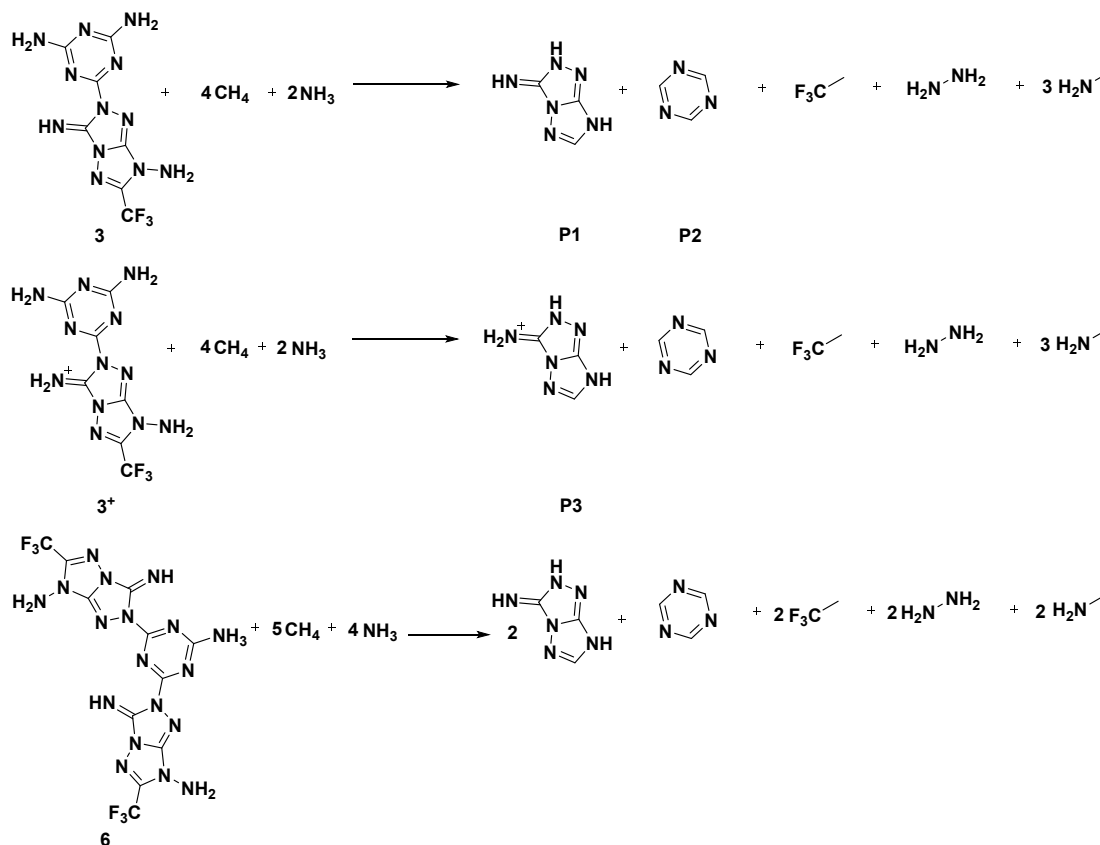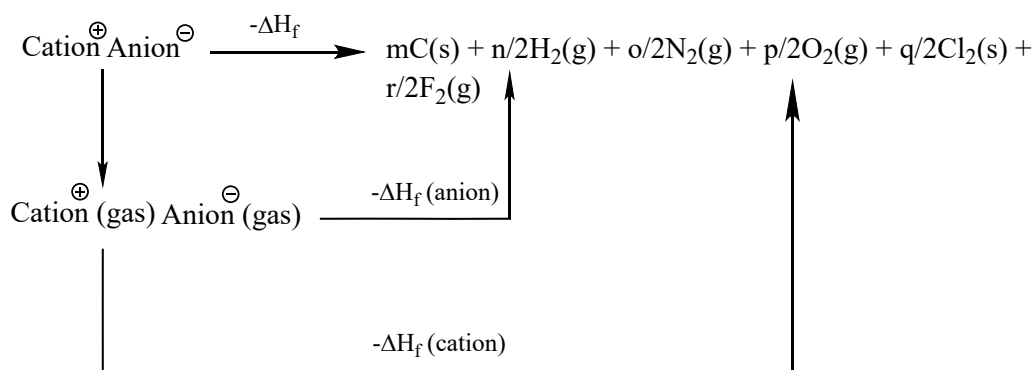

Table S8 The scaled zero point energies ( $ZPE$ ), values of thermal correction ( $H_{\text{corr}}$ ), total energy ( $E_0$ ) and heats of formation ( $HOF$ ).

| <i>Species</i>                  | <i>ZEP</i> | <i>H<sup>corr</sup></i> | <i>E<sub>0</sub></i> | <i>Corrected E<sub>0</sub></i> | <i>HOF(kJ mol<sup>-1</sup>)</i> |
|---------------------------------|------------|-------------------------|----------------------|--------------------------------|---------------------------------|
| <b>3</b>                        | 0.194332   | 0.21419                 | -1227.490152         | -1227.28374                    | - 5.7345196                     |
| <b>3<sup>+</sup></b>            | 0.203501   | 0.224309                | -1228.046598         | -1227.83043                    | 137.1672365                     |
| <b>6</b>                        | 0.271964   | 0.302576                | -2008.466028         | -2008.17433                    | 20.8292104                      |
| P1                              | 0.092964   | 0.100651                | -445.1702301         | -445.07330                     | 500.3913449                     |
| P2                              | 0.065605   | 0.070658                | -280.3783907         | -280.31036                     | 225.87                          |
| P3                              | 0.103242   | 0.111548                | -445.7222398         | -445.61482                     | 609.2133248                     |
| CH <sub>4</sub>                 | 0.045214   | 0.049022                | -40.5203022          | -40.47309                      | -74.6                           |
| NH <sub>3</sub>                 | 0.034534   | 0.038337                | -56.5491671          | -56.51221                      | -45.90                          |
| CH <sub>3</sub> CF <sub>3</sub> | 0.052891   | 0.058625                | -377.5614376         | -377.50493                     | -772.0207611                    |
| NH <sub>2</sub> NH <sub>2</sub> | 0.053494   | 0.057694                | -111.859798          | -111.80424                     | 95.35                           |
| CH <sub>3</sub> NH <sub>2</sub> | 0.064435   | 0.068758                | -95.8575523          | -95.79137                      | -23.5                           |

Table S9 Calculated heat of formation for energetic salts.

| Compound | $\Delta H_L(kJ mol^{-1})$ | $\Delta H_f^{cation}(kJ mol^{-1})$ | $\Delta H_f^{anion}(kJ mol^{-1})$ | $\Delta H_f^{298}(kJ mol^{-1})$ |
|----------|---------------------------|------------------------------------|-----------------------------------|---------------------------------|
| <b>4</b> | 431.2132625               | 137.2                              | 307.7135581                       | 13.66753209                     |
| <b>5</b> | 442.3251163               | 137.2                              | -314.39                           | -619.5478798                    |

Table S10 Cartesian coordinates of compound **3**.

| Atom | X       | Y       | Z       |
|------|---------|---------|---------|
| C    | 0.2026  | 3.7556  | 0.1989  |
| N    | 0.5527  | 2.4702  | 0.2075  |
| C    | -0.472  | 1.6312  | 0.0629  |
| N    | -1.7518 | 1.9721  | -0.0818 |
| C    | -1.9638 | 3.2873  | -0.0731 |
| N    | -1.0342 | 4.2318  | 0.0629  |
| N    | -0.2045 | 0.3938  | 0.0629  |
| C    | -1.2011 | -0.7181 | 0.0629  |
| N    | -0.4349 | -1.8707 | 0.4711  |
| C    | 0.8748  | -1.4323 | 0.3023  |
| N    | 1.0857  | -0.1736 | 0.0629  |
| N    | -0.6065 | -3.1913 | 0.0538  |
| C    | 0.6407  | -3.5876 | -0.0595 |
| N    | 1.5661  | -2.6    | 0.1649  |
| N    | 1.1325  | 4.6043  | 0.3326  |
| N    | -3.1613 | 3.6761  | -0.2065 |
| N    | -2.4262 | -0.6628 | -0.2263 |
| N    | 2.9074  | -2.7547 | 0.2362  |
| C    | 1.0192  | -4.9945 | -0.4034 |
| F    | 2.4061  | -5.1044 | -0.4498 |

|   |         |         |         |
|---|---------|---------|---------|
| F | 0.4863  | -5.3272 | -1.6456 |
| F | 0.5176  | -5.8597 | 0.5647  |
| H | 0.9106  | 5.6306  | 0.3326  |
| H | 2.1256  | 4.2819  | 0.4433  |
| H | -3.3831 | 4.7024  | -0.2064 |
| H | -3.9325 | 2.9722  | -0.3172 |
| H | -2.6828 | 0.2937  | -0.4791 |
| H | 3.5055  | -1.9466 | 0.4084  |
| H | 3.3211  | -3.6795 | 0.1178  |

Table S11 Cartesian coordinates of compound **3<sup>+</sup>**.

| Atom | X       | Y       | Z       |
|------|---------|---------|---------|
| C    | -5.2408 | -2.0879 | -0.4128 |
| N    | -3.9468 | -1.7714 | -0.393  |
| C    | -3.7091 | -0.4901 | -0.1164 |
| N    | -4.6272 | 0.4439  | 0.1281  |
| C    | -5.8803 | -0.0051 | 0.0772  |
| N    | -6.2563 | -1.2556 | -0.187  |
| N    | -2.4972 | -0.1257 | -0.0828 |
| C    | -2.0077 | 1.2776  | 0.0601  |
| N    | -0.6295 | 1.209   | -0.3618 |
| C    | -0.3776 | -0.1592 | -0.3338 |
| N    | -1.3755 | -0.9744 | -0.1738 |
| N    | 0.4438  | 1.9526  | 0.1308  |
| C    | 1.3953  | 1.0473  | 0.1484  |
| N    | 0.9793  | -0.2113 | -0.2054 |
| N    | -5.5328 | -3.2926 | -0.6702 |
| N    | -6.8004 | 0.8353  | 0.3008  |
| N    | -2.6693 | 2.319   | 0.4694  |
| N    | 1.7645  | -1.2962 | -0.3913 |
| C    | 2.8105  | 1.3614  | 0.522   |
| F    | 3.579   | 0.2032  | 0.4468  |
| F    | 2.8472  | 1.8583  | 1.8217  |
| F    | 3.321   | 2.3144  | -0.3549 |
| H    | -6.538  | -3.5947 | -0.6981 |
| H    | -4.7698 | -3.9896 | -0.8558 |
| H    | -7.8056 | 0.5331  | 0.2729  |
| H    | -6.5582 | 1.8344  | 0.5142  |
| H    | -3.6723 | 2.2249  | 0.7469  |
| H    | -2.198  | 3.2503  | 0.5209  |
| H    | 1.3471  | -2.1887 | -0.655  |
| H    | 2.7743  | -1.2221 | -0.2679 |

Table S12 Cartesian coordinates of compound 6.

| Atom | X       | Y       | Z       |
|------|---------|---------|---------|
| C    | -2.0579 | 1.2617  | 0.3183  |
| N    | -3.3477 | 1.7635  | 0.7265  |
| C    | -4.1667 | 0.6513  | 0.5577  |
| N    | -3.615  | -0.4994 | 0.3183  |
| N    | -3.9673 | 2.9423  | 0.3092  |
| C    | -5.2153 | 2.5489  | 0.1959  |
| N    | -5.404  | 1.2086  | 0.4203  |
| N    | -1.0241 | 1.9213  | 0.029   |
| N    | -6.5899 | 0.5634  | 0.4916  |
| N    | -1.6578 | -2.3551 | 0.4629  |
| C    | -1.3024 | -1.0793 | 0.3183  |
| N    | -0.0596 | -0.6218 | 0.1736  |
| C    | 0.8706  | -1.5754 | 0.1823  |
| N    | 0.6537  | -2.8828 | 0.3183  |
| C    | -0.6318 | -3.205  | 0.4543  |
| N    | -0.9041 | -4.4341 | 0.5879  |
| N    | -2.2332 | -0.2211 | 0.3183  |
| N    | 2.0737  | -1.2044 | 0.0489  |
| C    | 3.2827  | -2.0382 | 0.3177  |
| N    | 4.3528  | -1.0755 | 0.4182  |
| C    | 3.7799  | 0.065   | -0.1361 |
| N    | 2.5044  | 0.0676  | -0.3793 |
| N    | 5.6809  | -1.243  | 0.0236  |
| C    | 5.9451  | -0.064  | -0.4916 |
| N    | 4.8687  | 0.7858  | -0.5303 |
| N    | 3.3523  | -3.2912 | 0.4307  |
| N    | 4.8842  | 2.0888  | -0.8904 |
| C    | -6.3344 | 3.4817  | -0.1481 |
| F    | -7.532  | 2.7736  | -0.1944 |
| F    | -6.09   | 4.0605  | -1.3902 |
| F    | -6.422  | 4.4781  | 0.8201  |
| C    | 7.3026  | 0.3192  | -0.993  |
| F    | 7.268   | 1.6238  | -1.4772 |
| F    | 7.6794  | -0.5453 | -2.017  |
| F    | 8.2224  | 0.2353  | 0.0485  |
| H    | -0.2638 | 1.2867  | -0.2237 |
| H    | -6.6142 | -0.4416 | 0.6638  |
| H    | -7.4604 | 1.0817  | 0.3732  |
| H    | -0.1321 | -5.1458 | 0.588   |
| H    | -1.9018 | -4.7418 | 0.6987  |

|   |        |         |         |
|---|--------|---------|---------|
| H | 2.4257 | -3.7051 | 0.3098  |
| H | 4.0199 | 2.6304  | -0.8828 |
| H | 5.7603 | 2.5304  | -1.1696 |

#### 4. DSC spectra of all products

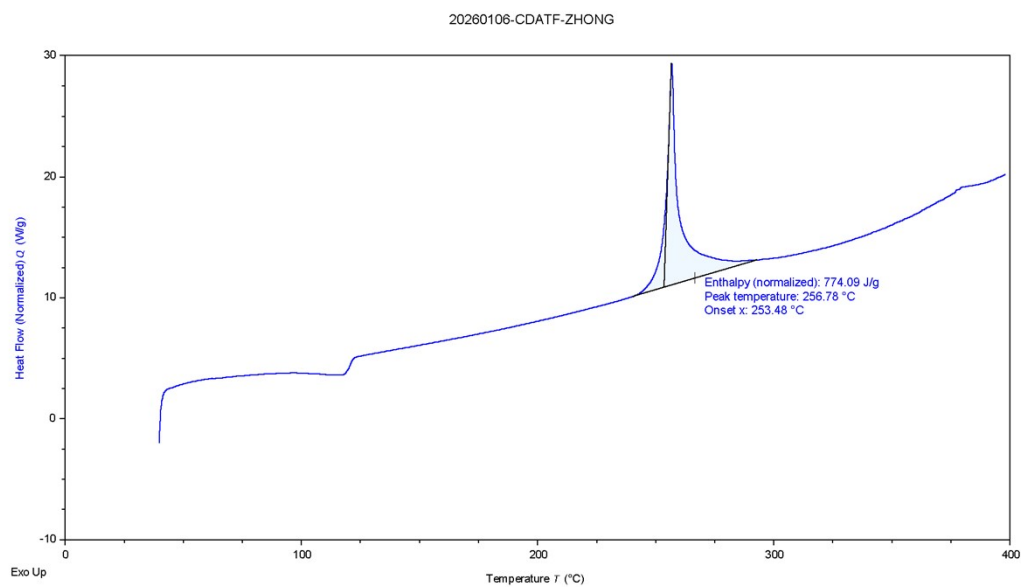

Figure S3. DSC curve of **3**.

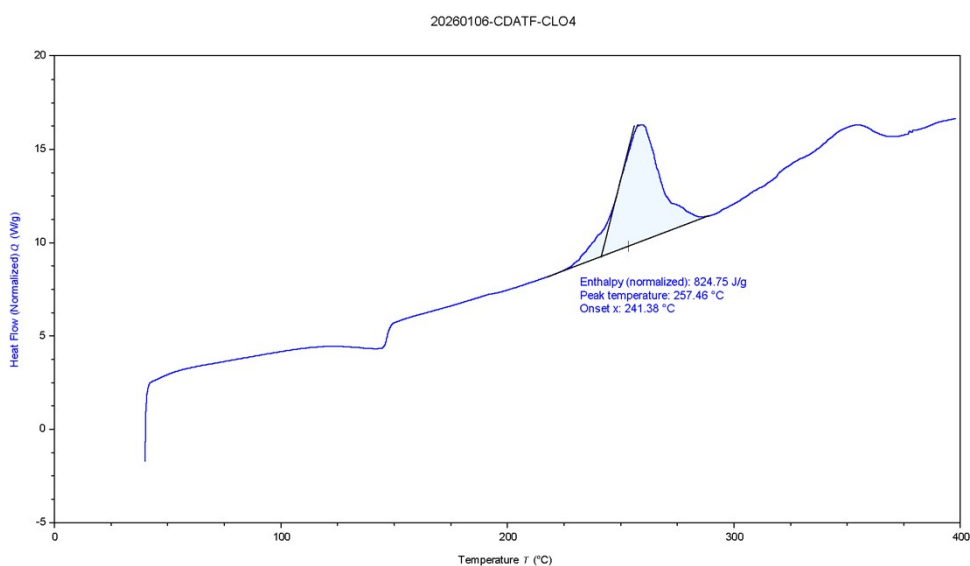

Figure S4. DSC curve of **4**.

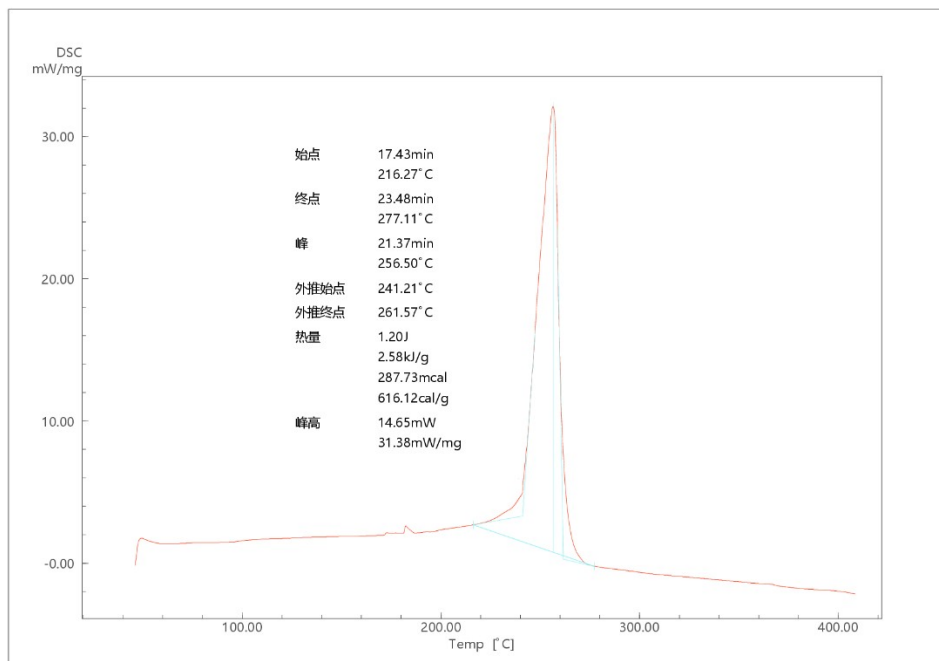

Figure S5. DSC curve of 5.

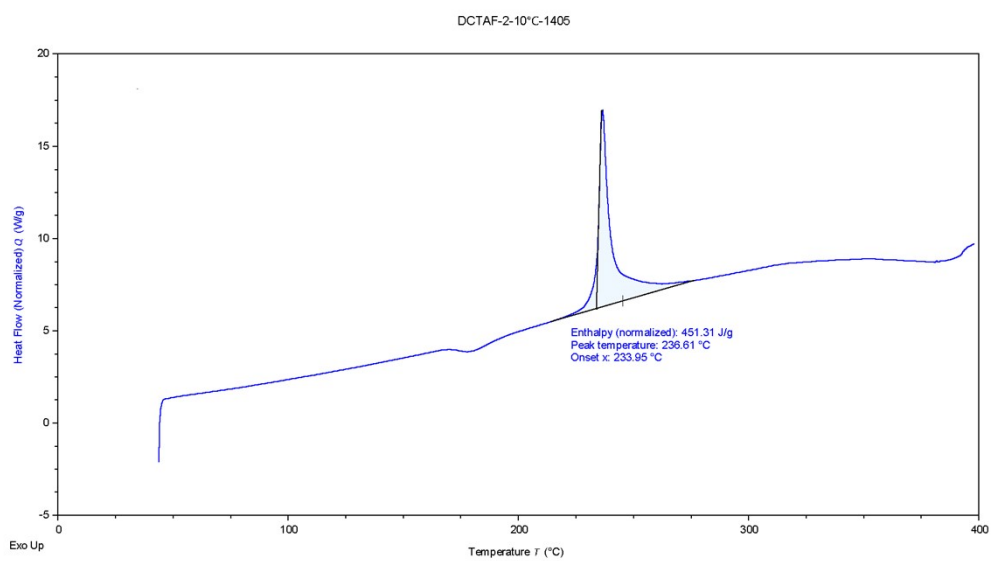

Figure S6. DSC curve of 5.

## 5. $^1\text{H}$ , $^{19}\text{F}$ and $^{13}\text{C}$ NMR spectra of all products

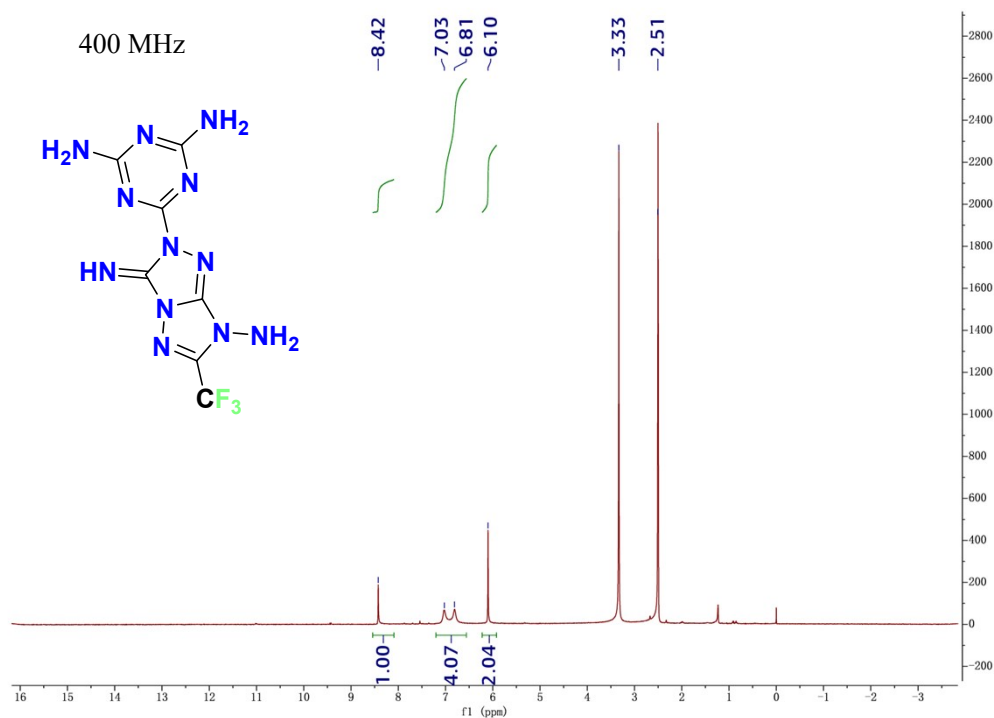

Figure S7.  $^1\text{H}$  NMR of **3** in  $\text{DMSO}-d_6$ .

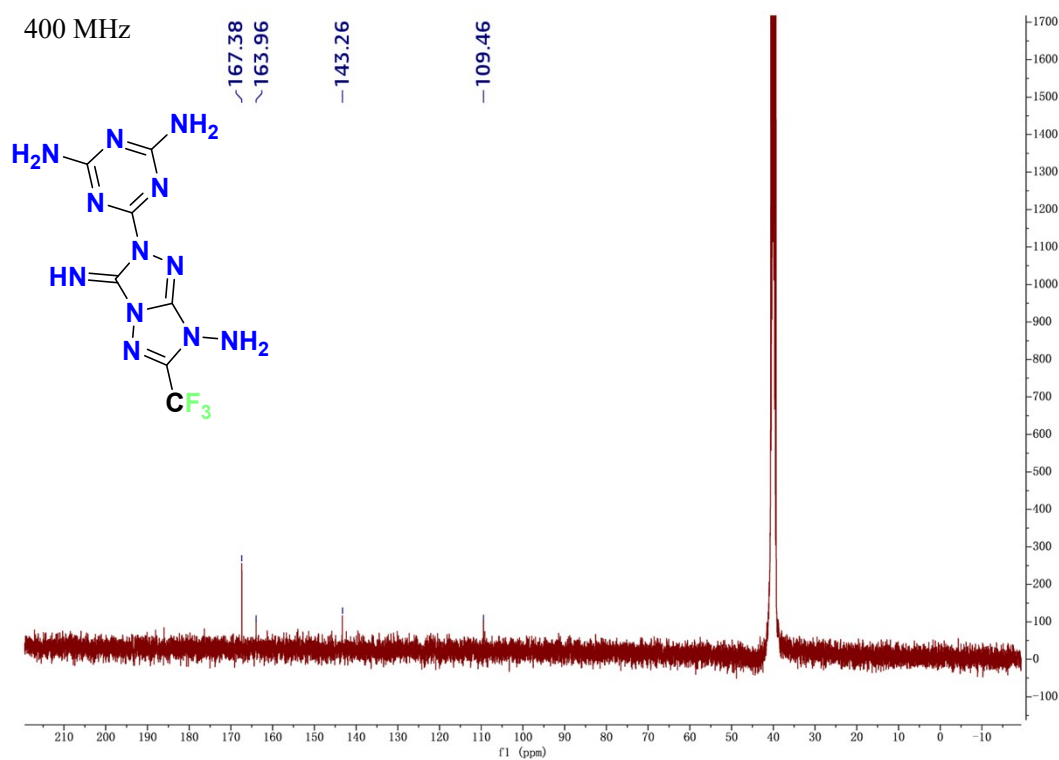

Figure S8.  $^{13}\text{C}$  NMR of **3** in  $\text{DMSO}-d_6$ .

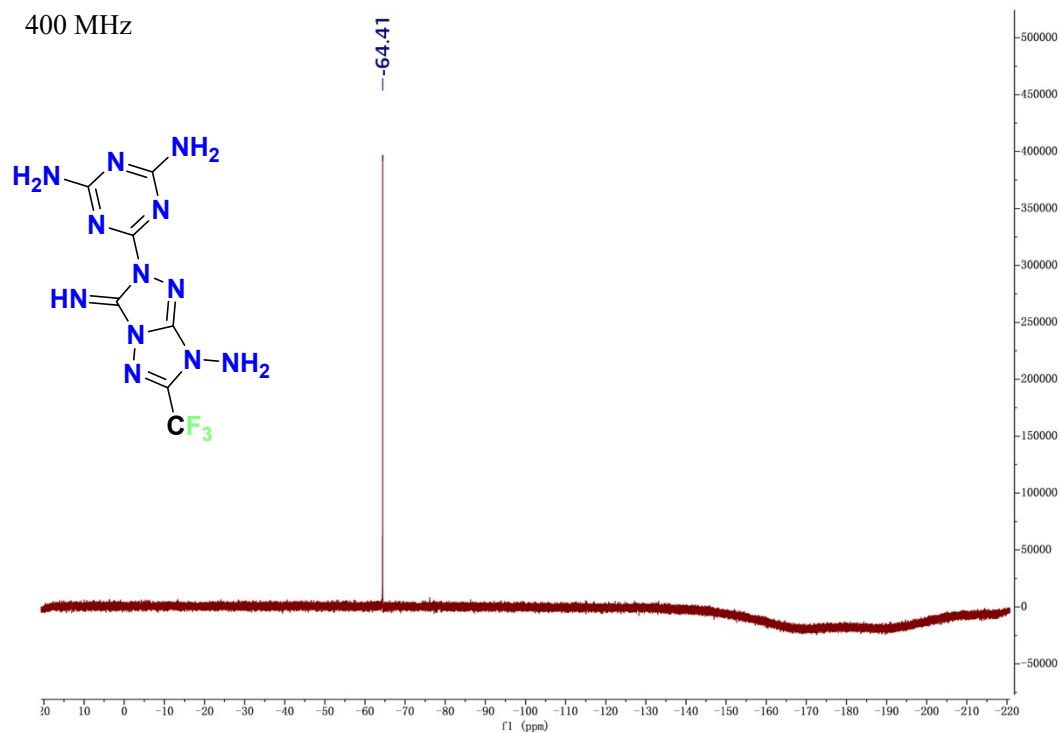

Figure S9.  $^{19}\text{F}$  NMR of **3** in  $\text{DMSO-}d_6$ .

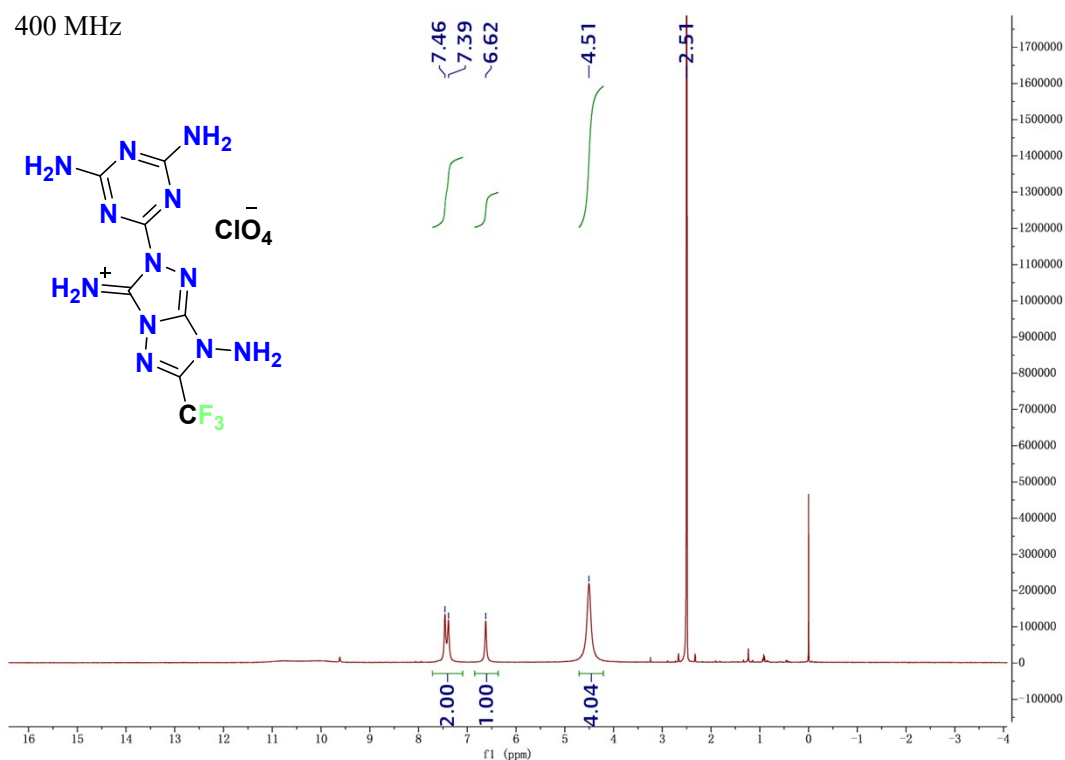

Figure S10.  $^1\text{H}$  NMR of **4** in  $\text{DMSO-}d_6$ .

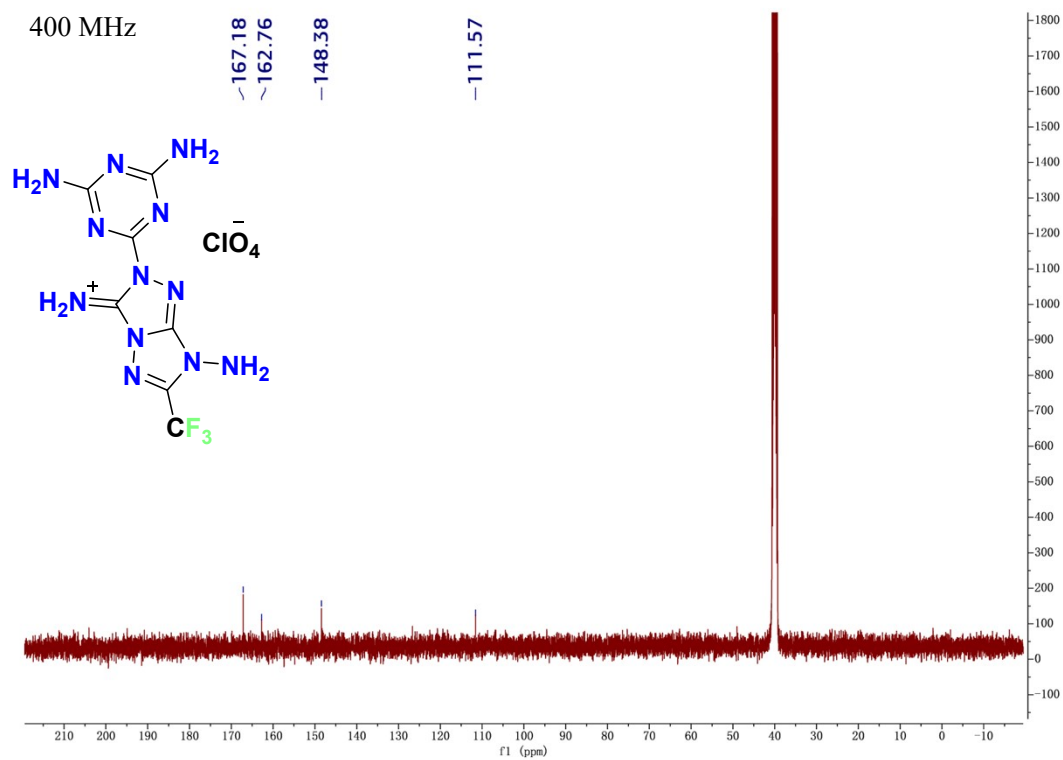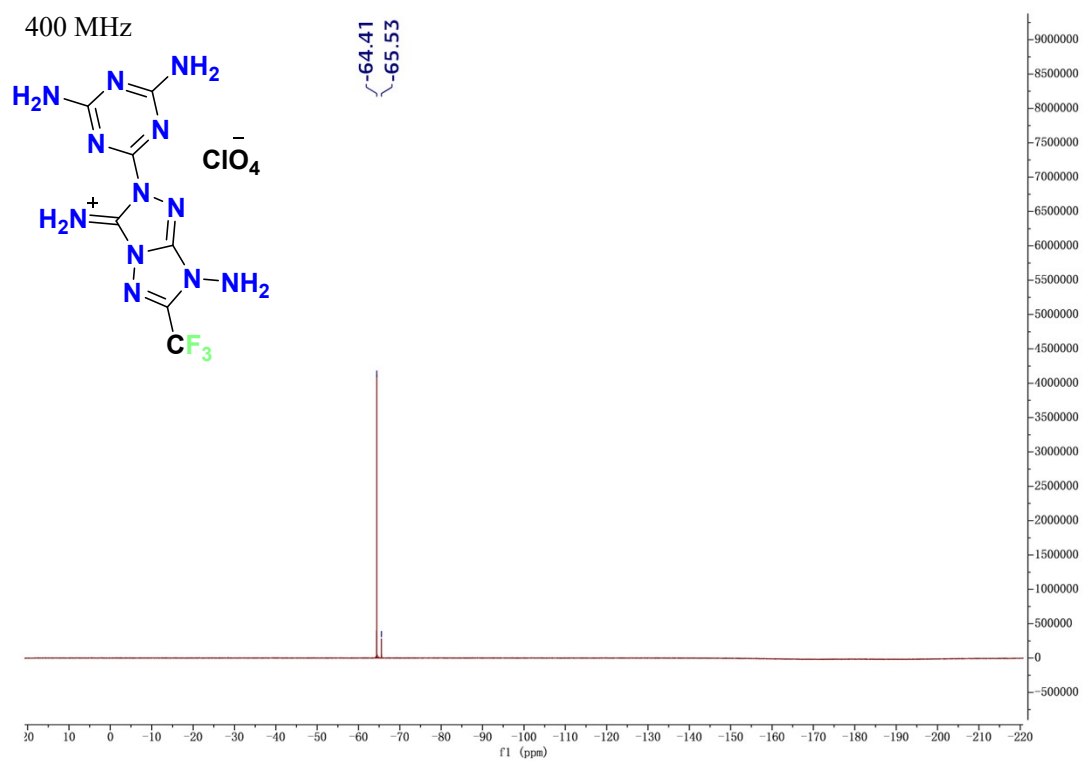

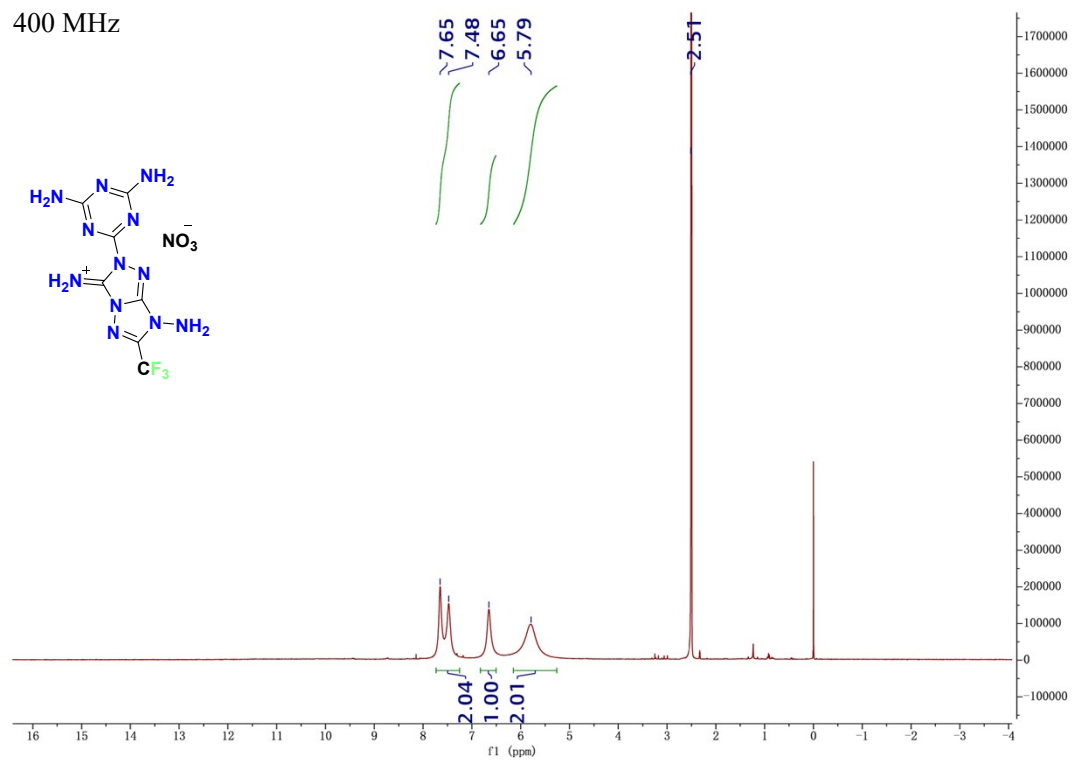

Figure S13.  $^1\text{H}$  NMR of **5** in  $\text{DMSO-}d_6$ .

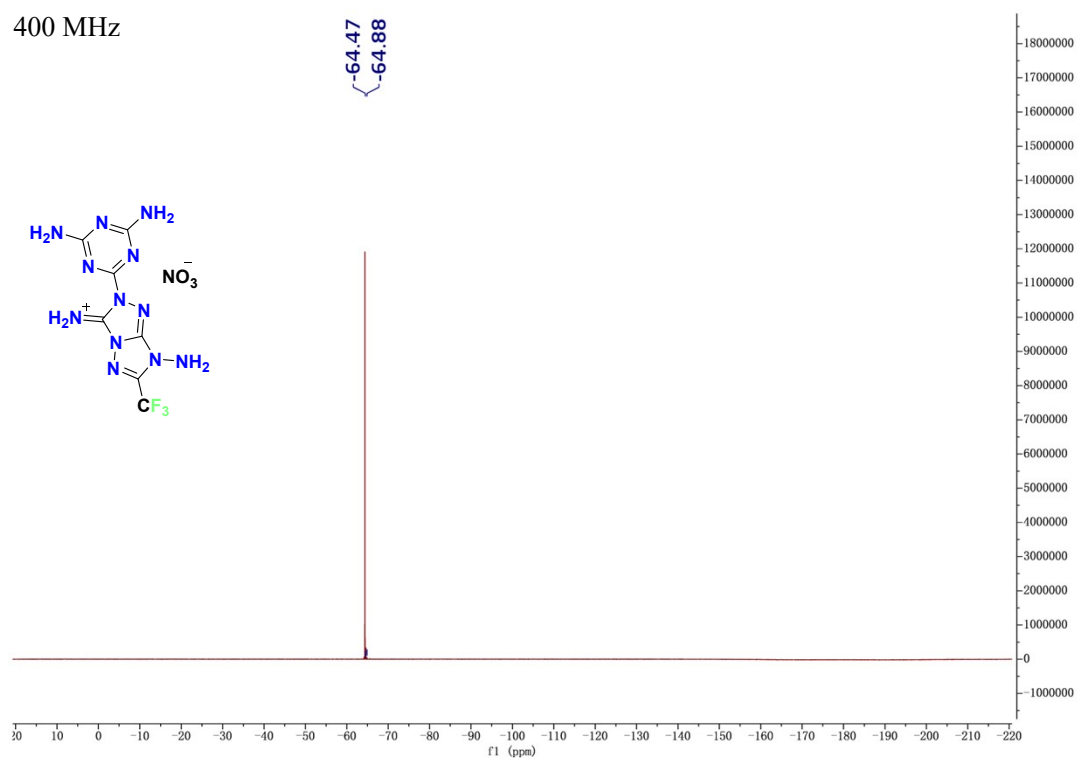

Figure S14.  $^{19}\text{F}$  NMR of **5** in  $\text{DMSO-}d_6$ .

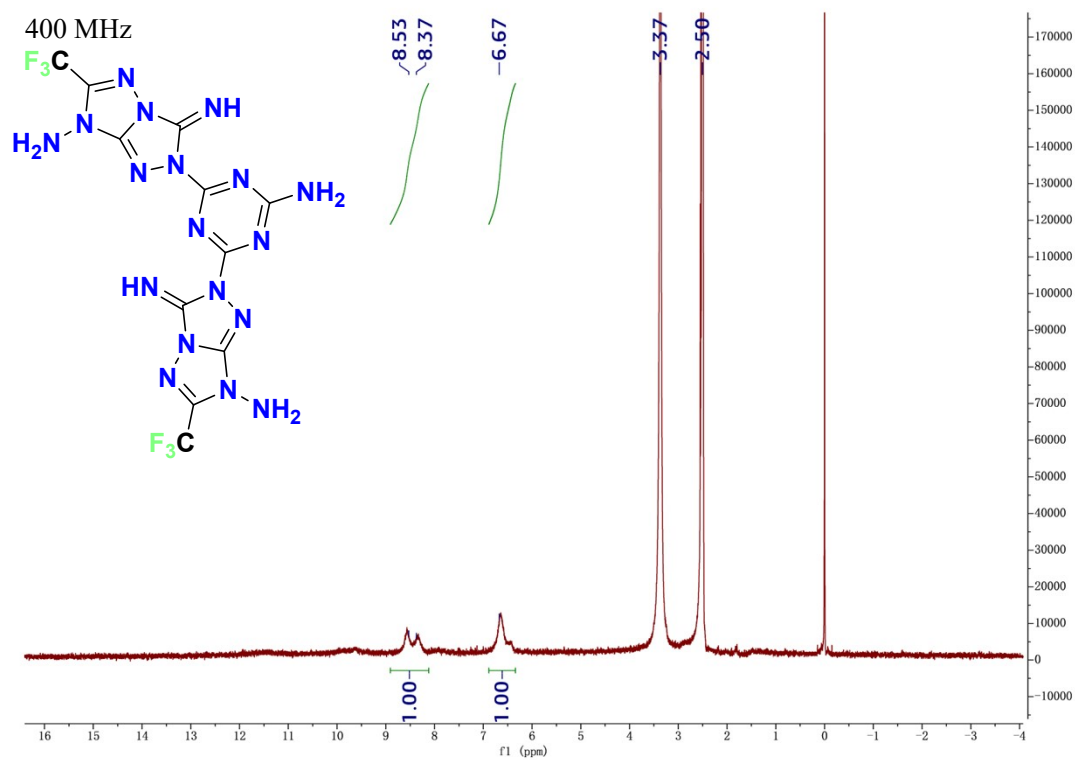

Figure S15.  $^1\text{H}$  NMR of **6** in  $\text{DMSO-}d_6$ .

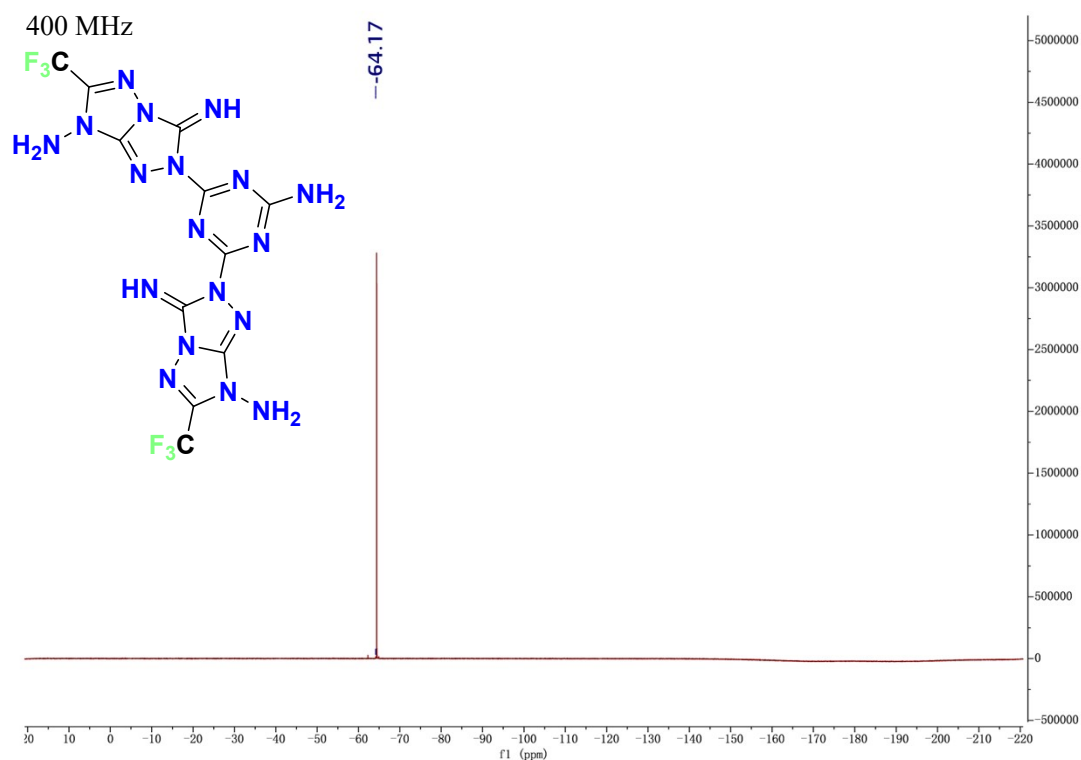

Figure S16.  $^{19}\text{F}$  NMR of **6** in  $\text{DMSO-}d_6$ .

## 6. HRMS of 3 and 6

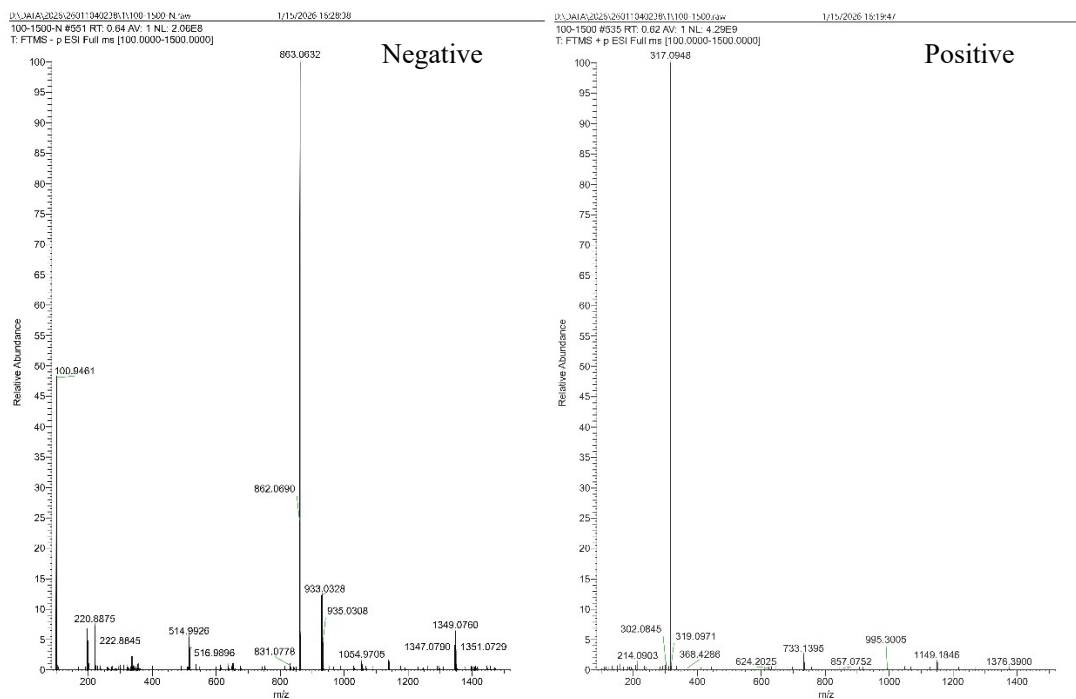

Figure S17. HRMS of 3.

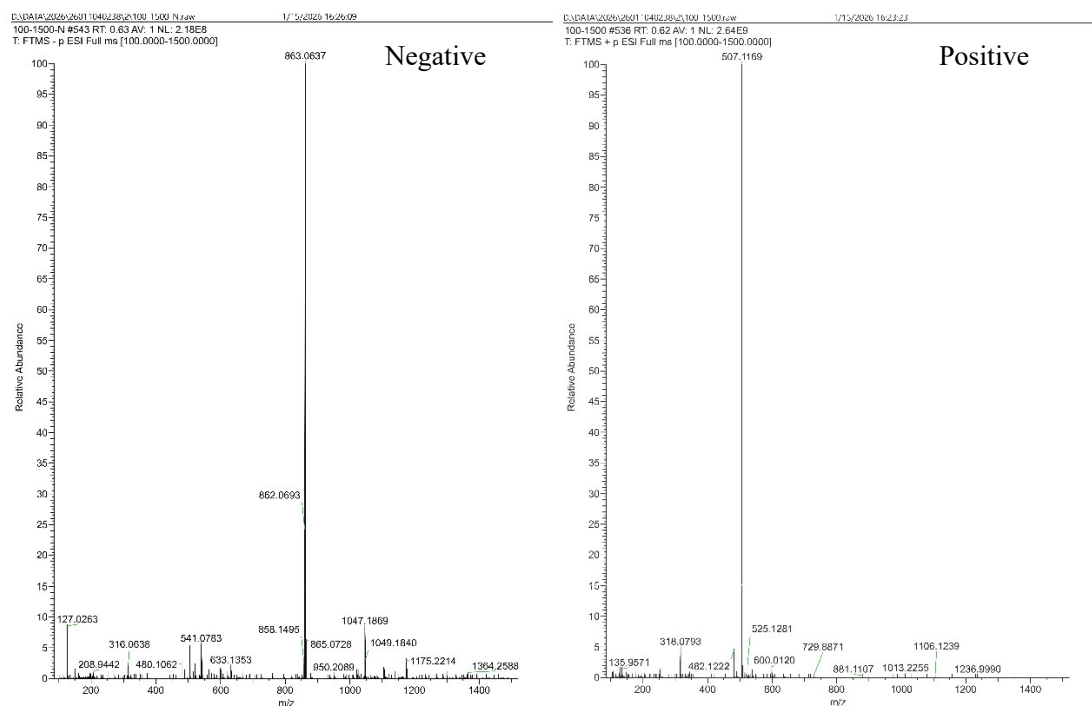

Figure S18. HRMS of 6.

## 7. Ozawa curves of 3-6

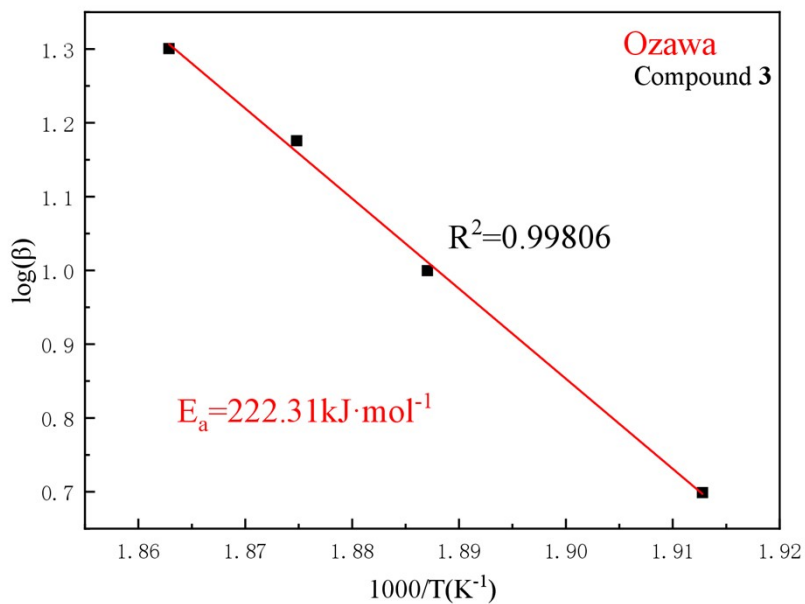

Figure S19. Ozawa curves of 3.

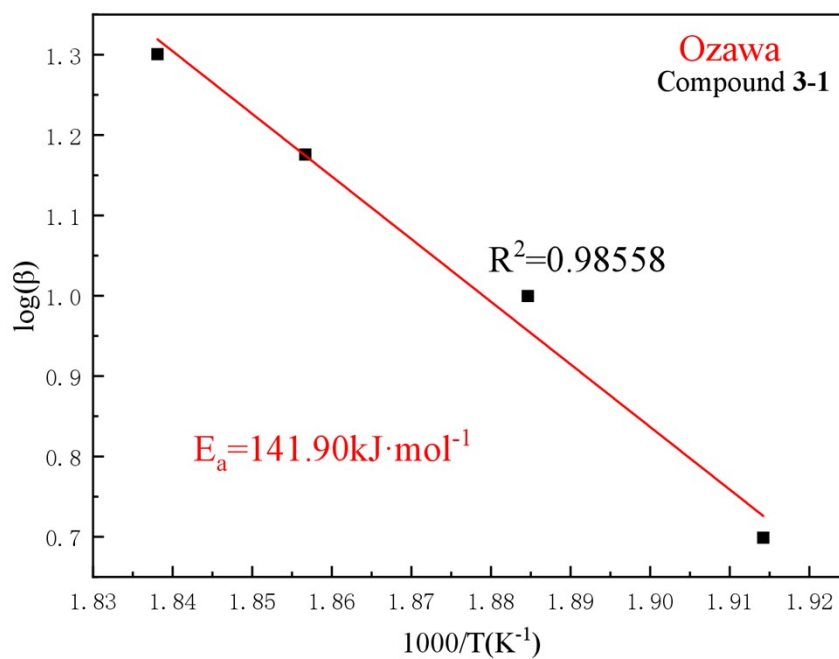

Figure S20. Ozawa curves of 4.

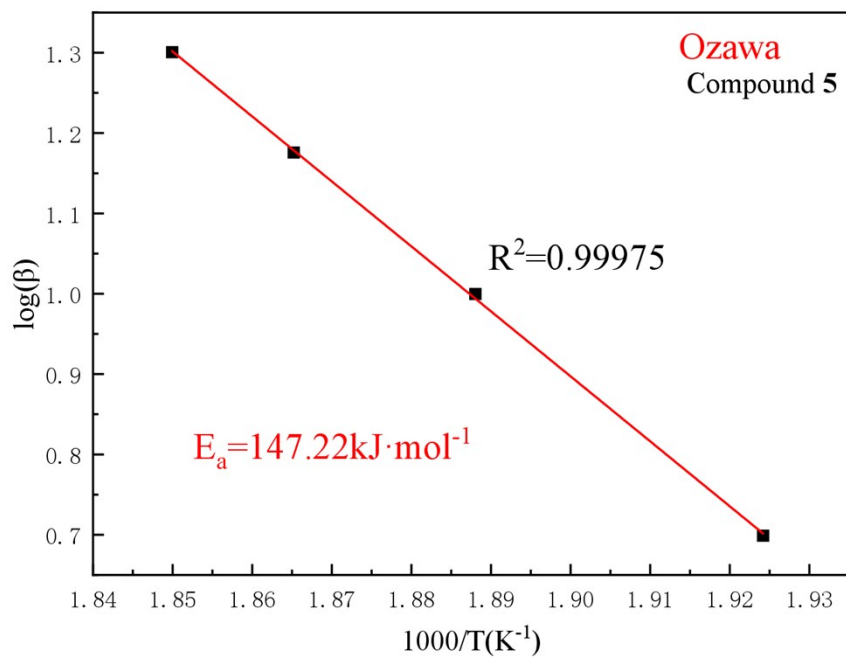

Figure S21. Ozawa curves of 5.

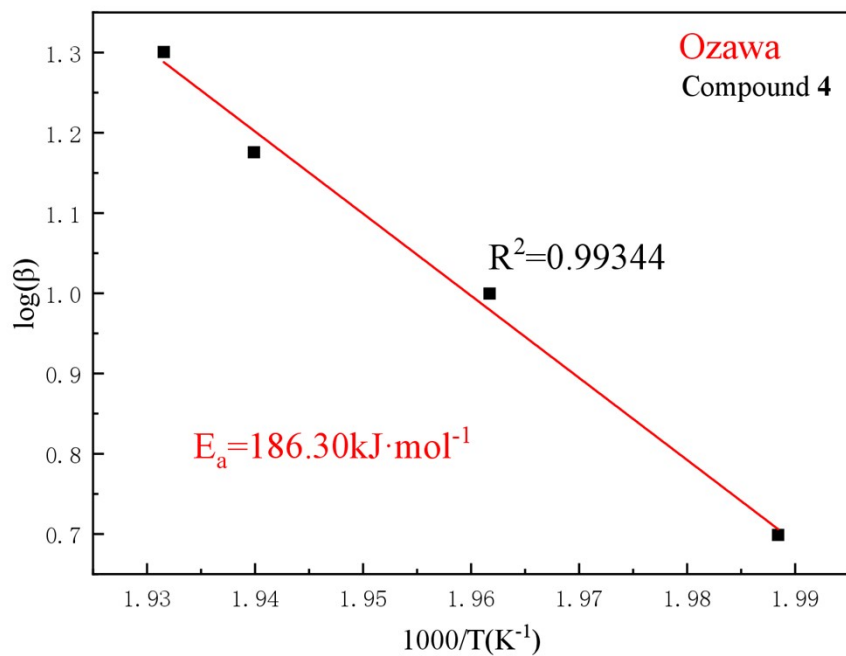

Figure S22. Ozawa curves of 6.

## References

- [1] S. Kronister, D. Svatunek, C. Denk and H. Mikula, *Synlett*, 2018, 29, 1297–1302.
- [2] A. D. Becke, *J. Chem Phys.* **1993**, 98, 5648-5652.
- [3] a) A. Strömberg, O. Gropen, U. Wahlgren, *J. Comput. Chem.* **1983**, 4, 181–186; b) M. N. Glukhovtsev, A. Pross, M. P. McGrath, L. Radom, *J. Chem. Phys.* **1995**, 103, 1878–1885.
- [4] H. D. B. Jenkins, D. Tudela and L. Glasser, *Inorg. Chem.*, 2002, **41**, 2364-2367.
